# Supplementary material for: Occurrence of virulent multidrug-resistant Enterococcus faecalis and Enterococcus faecium in the pigs, farmers and farm environments in Malaysia
Source: PeerJ. 2018 Aug 6;6:e5353. doi: 10.7717/peerj.5353 (PMC6084283; doi:10.7717/peerj.5353)
Supplement: File S6 [file peerj-06-5353-s006.xlsx]

## Sheet: Sheet 1
Strain Code	Farm	Sample Matrix	Sampel Subject	Species	Resistotypes	Antibiotic Susceptibility (1 = Non Susceptible, 0 = Susceptible)											Virulence genes detection ( 1= presence, 0 = absence)							Resistance genes detection ( 1= presence, 0 = absence)																Biofilm forming ability (1 = Biofilm former, 0 = Non Former)
						AMP10	P10	TEC30	E15	TET30	CIP5	ENR5	C30	LZD30	CN10	CN120	ace	efa	gelE	asaI	esp	cyl	hyl	ermA	msr	ermB	TetL	TetM	VanA	VanB	VanC1	VanC2/C3	AS	ant (4')-Ia	aph 2"-Ia	aph 2"-Ib	aph 2"-Ic	aph 2"-Id	aph 2"-IIIa
Enfs113	PF5	Rectal	Pig	Enterococcus faecalis	E15, TET30, CIP5, C30, LZD30, CN10	0	0	0	1	1	1	0	1	1	1	0	1	1	1	0	0	0	0	0	0	1	1	1	0	0	0	0	0	0	1	0	0	0	1	0
Enfs89	PF3	Fecal	Pig	Enterococcus faecalis	P10, E15, TET30, CIP5, C30, LZD30, CN10	0	1	0	1	1	1	0	1	1	1	0	0	1	1	1	1	0	0	1	0	1	1	1	0	0	0	0	1	0	1	0	0	0	1	0
P.En075	SF1	Rectal	Pig	Enterococcus faecalis	E15, TET30, CIP5, C30, CN10, CN120	0	0	0	1	1	1	0	1	0	1	1	0	1	1	1	0	0	0	0	0	1	1	1	0	0	0	0	0	0	0	0	0	0	0	1
P.En084	SF1	Rectal	Pig	Enterococcus faecalis	E15, TET30, CIP5, C30, LZD30, CN10, CN120	0	0	0	1	1	1	0	1	1	1	1	0	0	0	0	0	0	0	1	0	1	1	1	0	0	0	1	0	0	0	0	0	0	1	0
P.En110	SF1	Nasal	Human	Enterococcus faecalis	E15, TET30, CIP5, ENR5, C30, LZD30, CN10, CN120	0	0	0	1	1	1	1	1	1	1	1	0	1	1	1	1	0	0	0	0	1	0	1	0	0	0	0	0	0	0	0	0	0	0	0
Enfs03	PF5	Fecal	Pig	Enterococcus faecalis	E15, TET30, CIP5, C30, LZD30, CN10	0	0	0	1	1	1	0	1	1	1	0	0	1	1	0	0	0	0	1	0	1	0	1	0	0	0	0	0	0	0	0	0	0	0	1
Enfs04	PF5	Fecal	Pig	Enterococcus faecalis	E15, TET30, CIP5, C30, LZD30, CN10	0	0	0	1	1	1	0	1	1	1	0	0	1	1	0	0	0	0	1	0	1	0	1	0	0	0	0	0	0	0	0	0	0	1	1
Enfs10	PF4	Fecal	Pig	Enterococcus faecalis	E15, TET30, CIP5, C30, LZD30, CN10	0	0	0	1	1	1	0	1	1	1	0	0	1	1	0	0	0	0	1	0	1	0	1	0	0	0	0	0	0	0	0	0	0	0	1
Enfs12	PF4	Fecal	Pig	Enterococcus faecalis	E15, TET30, CIP5, C30, LZD30, CN10	0	0	0	1	1	1	0	1	1	1	0	0	1	1	1	0	1	0	1	0	1	1	1	0	0	0	0	1	0	1	0	0	0	1	1
P.En218	SF2	Fecal	Human	Enterococcus faecalis	E15, TET30, CIP5, ENR5, C30, LZD30, CN10, CN120	0	0	0	1	1	1	1	1	1	1	1	0	0	1	1	1	1	0	1	1	1	1	1	0	0	0	0	0	0	0	0	0	0	1	0
P.En220	SF2	Fecal	Human	Enterococcus faecalis	E15, TET30, CIP5, ENR5, C30, LZD30, CN10, CN120	0	0	0	1	1	1	1	1	1	1	1	0	0	0	1	1	0	0	1	0	1	1	1	0	0	0	0	0	0	0	0	0	0	0	0
Enfs01	PF5	Fecal	Pig	Enterococcus faecalis	E15, TET30, CIP5, C30, CN10, CN120	0	0	0	1	1	1	0	1	0	1	1	0	1	1	0	0	0	0	0	0	1	1	1	0	0	0	0	0	0	1	0	0	0	1	1
Enfs02	PF5	Fecal	Pig	Enterococcus faecalis	E15, TET30, CIP5, C30, CN10, CN120	0	0	0	1	1	1	0	1	0	1	1	0	1	1	0	0	0	0	0	1	1	1	1	0	0	0	0	0	0	0	0	0	0	0	1
Enfs07	PF4	Fecal	Pig	Enterococcus faecalis	E15, TET30, CIP5, C30, CN10, CN120	0	0	0	1	1	1	0	1	0	1	1	0	1	1	0	0	0	0	0	0	1	1	1	0	0	0	0	0	0	1	0	0	0	1	1
Enfs08	PF4	Fecal	Pig	Enterococcus faecalis	E15, TET30, CIP5, C30, CN10, CN120	0	0	0	1	1	1	0	1	0	1	1	0	1	1	0	0	0	0	0	0	1	1	1	0	0	0	0	0	0	0	0	0	0	1	1
Enfs13	PF4	Fecal	Pig	Enterococcus faecalis	E15, TET30, C30, CN10	0	0	0	1	1	0	0	1	0	1	0	0	1	1	1	0	0	0	1	0	1	1	1	0	0	0	0	0	0	0	0	0	0	1	1
Enfs14	PF4	Fecal	Pig	Enterococcus faecalis	P10, E15, TET30, CIP5, C30, CN10	0	1	0	1	1	1	0	1	0	1	0	1	1	1	1	1	0	0	0	0	1	1	1	0	0	0	0	1	0	1	0	0	0	1	1
Enfs15	PF4	Fecal	Pig	Enterococcus faecalis	E15, TET30, C30, CN10	0	0	0	1	1	0	0	1	0	1	0	1	1	0	1	1	1	0	1	0	1	1	1	0	0	0	0	0	0	0	0	0	0	1	0
Enfs05	PF5	Fecal	Pig	Enterococcus faecalis	E15, TET30, C30, CN10	0	0	0	1	1	0	0	1	0	1	0	0	1	1	1	1	0	0	0	1	1	1	1	0	0	0	0	0	0	0	0	0	0	1	1
Enfs78	PF2	Fecal	Pig	Enterococcus faecalis	E15, TET30, CIP5, C30, LZD30, CN10, CN120	0	0	0	1	1	1	0	1	1	1	1	0	1	1	1	1	0	0	1	0	1	1	1	0	0	0	0	0	0	1	0	0	0	1	1
Enfs80	PF2	Fecal	Pig	Enterococcus faecalis	E15, TET30, CIP5, C30, CN10, CN120	0	0	0	1	1	1	0	1	0	1	1	0	1	0	0	0	0	0	0	0	1	1	1	0	0	0	0	1	0	1	0	0	0	1	0
Enfs22	PF1	Fecal	Pig	Enterococcus faecalis	E15, TET30, CIP5, C30, LZD30, CN10, CN120	0	0	0	1	1	1	0	1	1	1	1	0	1	1	1	1	1	0	1	0	1	1	1	0	0	0	0	1	0	1	0	0	0	1	0
P.En004	SF1	Rectal	Pig	Enterococcus faecalis	E15, TET30, CIP5, C30, CN10, CN120	0	0	0	1	1	1	0	1	0	1	1	0	1	1	1	0	0	0	1	0	0	0	1	0	0	0	0	1	0	0	0	0	0	0	1
P.En043	SF1	Rectal	Pig	Enterococcus faecalis	E15, TET30, CIP5, C30, LZD30, CN10, CN120	0	0	0	1	1	1	0	1	1	1	1	0	1	0	1	0	0	0	1	0	1	1	1	0	0	0	0	1	0	1	0	0	0	1	0
Enfs37	PF1	Rectal	Pig	Enterococcus faecalis	E15, TET30, CIP5, C30, LZD30	0	0	0	1	1	1	0	1	1	0	0	1	1	1	1	1	1	0	1	0	1	1	1	0	0	0	0	0	0	1	0	0	0	1	0
Enfs47	PF1	Rectal	Pig	Enterococcus faecalis	E15, TET30, CIP5, C30, CN10, CN120	0	0	0	1	1	1	0	1	0	1	1	0	1	1	1	1	0	0	1	0	1	1	1	0	0	0	0	1	0	1	0	0	0	1	0
Enfs53	PF2	Fecal	Pig	Enterococcus faecalis	E15, TET30, CIP5, C30, LZD30	0	0	0	1	1	1	0	1	1	0	0	0	1	0	0	0	0	0	0	0	1	0	1	0	0	0	0	1	0	1	0	0	0	1	0
Enfs36	PF1	Rectal	Pig	Enterococcus faecalis	E15, TET30, CIP5, C30, LZD30, CN10, CN120	0	0	0	1	1	1	0	1	1	1	1	0	1	1	1	1	0	0	0	0	1	1	1	0	0	0	0	0	0	0	0	0	0	1	1
Enfs38	PF1	Rectal	Pig	Enterococcus faecalis	E15, TET30, CIP5, C30, LZD30, CN10	0	0	0	1	1	1	0	1	1	1	0	0	1	0	1	1	1	0	1	0	1	1	1	0	0	0	0	1	0	1	0	0	0	1	0
Enfs39	PF1	Rectal	Pig	Enterococcus faecalis	E15, TET30, CIP5, C30, LZD30, CN10, CN120	0	0	0	1	1	1	0	1	1	1	1	0	1	0	1	1	1	0	1	0	1	1	1	0	0	0	0	0	0	1	0	0	0	1	0
Enfs40	PF1	Rectal	Pig	Enterococcus faecalis	E15, TET30, CIP5, C30, LZD30, CN10, CN120	0	0	0	1	1	1	0	1	1	1	1	0	1	1	0	0	0	0	1	1	1	1	1	0	0	0	0	0	0	1	0	0	0	1	1
Enfs41	PF1	Rectal	Pig	Enterococcus faecalis	E15, TET30, CIP5, C30, CN10, CN120	0	0	0	1	1	1	0	1	0	1	1	0	1	1	1	0	0	0	1	1	1	1	1	0	0	0	0	1	0	0	0	0	0	1	1
Enfs48	PF1	Rectal	Pig	Enterococcus faecalis	E15, TET30, CIP5, C30, LZD30, CN10, CN120	0	0	0	1	1	1	0	1	1	1	1	0	1	1	1	1	0	0	0	1	1	1	1	0	0	0	0	0	0	0	0	0	0	1	1
Enfs49	PF1	Rectal	Pig	Enterococcus faecalis	E15, TET30, CIP5, C30, LZD30, CN10, CN120	0	0	0	1	1	1	0	1	1	1	1	0	1	0	0	0	0	0	0	1	1	1	1	0	0	0	0	0	0	0	0	0	0	1	1
P.En090	SF1	Rectal	Pig	Enterococcus faecalis	E15, TET30, CIP5, ENR5, C30, CN10, CN120	0	0	0	1	1	1	1	1	0	1	1	0	1	0	1	0	0	0	0	0	1	1	1	0	0	0	0	0	0	0	0	0	0	0	1
Enfs45	PF1	Rectal	Pig	Enterococcus faecalis	E15, TET30, CIP5, C30, LZD30, CN10, CN120	0	0	0	1	1	1	0	1	1	1	1	0	1	1	1	1	1	0	0	0	1	0	1	0	0	0	0	1	0	1	0	0	0	1	0
Enfs85	PF1	Fecal	Pig	Enterococcus faecalis	E15, TET30, CIP5, C30, LZD30, CN10, CN120	0	0	0	1	1	1	0	1	1	1	1	0	1	0	1	0	0	0	1	0	1	1	1	0	0	0	0	0	0	0	0	0	0	1	1
Enfs86	PF1	Fecal	Pig	Enterococcus faecalis	E15, TET30, CIP5, C30, LZD30, CN10	0	0	0	1	1	1	0	1	1	1	0	0	1	0	1	0	0	0	1	0	1	1	1	0	0	0	0	0	0	0	0	0	0	1	1
Enfs34	PF1	Rectal	Pig	Enterococcus faecalis	E15, TET30, CIP5, C30, CN10, CN120	0	0	0	1	1	1	0	1	0	1	1	0	1	1	0	0	0	0	1	0	1	1	0	0	0	0	0	0	0	0	0	0	0	1	0
Enfs35	PF1	Rectal	Pig	Enterococcus faecalis	E15, TET30, CIP5, C30, CN10, CN120	0	0	0	1	1	1	0	1	0	1	1	0	1	1	1	1	1	0	0	0	1	1	1	0	0	0	0	1	0	1	0	0	0	1	1
Enfs138	PF4	Rectal	Pig	Enterococcus faecalis	E15, TET30, C30, LZD30, CN10	0	0	0	1	1	0	0	1	1	1	0	0	1	1	1	1	1	0	0	0	1	0	1	0	0	0	0	1	0	1	0	0	0	1	1
P.En054	SF1	Rectal	Pig	Enterococcus faecalis	E15, TET30, CIP5, C30, CN10, CN120	0	0	0	1	1	1	0	1	0	1	1	0	1	1	1	0	0	0	1	0	1	1	1	0	0	0	0	1	0	1	0	0	0	1	1
P.En055	SF1	Rectal	Pig	Enterococcus faecalis	E15, TET30, CIP5, ENR5, C30, CN10, CN120	0	0	0	1	1	1	1	1	0	1	1	0	1	1	1	0	0	0	1	0	1	1	1	0	0	0	0	0	0	0	0	0	0	0	1
Enfs100	PF5	Rectal	Pig	Enterococcus faecalis	E15, TET30, CIP5, C30, LZD30, CN10, CN120	0	0	0	1	1	1	0	1	1	1	1	1	1	1	1	1	1	0	1	0	1	1	1	0	0	0	0	0	0	1	0	0	0	1	1
P.En086	SF1	Oral	Pig	Enterococcus faecalis	E15, TET30, CIP5, ENR5, C30, LZD30, CN10, CN120	0	0	0	1	1	1	1	1	1	1	1	0	1	0	1	0	0	0	0	0	1	1	1	0	0	0	0	0	0	1	0	0	0	1	1
Enfs114	PF4	Nasal	Human	Enterococcus faecalis	E15, TET30, CIP5, C30, LZD30, CN10	0	0	0	1	1	1	0	1	1	1	0	1	1	1	0	0	0	0	0	0	1	1	1	0	0	0	0	0	0	1	0	0	0	1	0
Enfs66	PF4	Oral	Pig	Enterococcus faecalis	E15, TET30, CIP5, C30, CN10	0	0	0	1	1	1	0	1	0	1	0	0	1	1	1	1	0	0	1	0	1	1	1	0	0	0	0	1	0	1	0	0	0	1	1
P.En020	SF1	Rectal	Pig	Enterococcus faecalis	E15, TET30, CIP5, C30, CN10, CN120	0	0	0	1	1	1	0	1	0	1	1	0	1	1	1	0	0	0	1	0	1	1	1	0	0	0	0	1	0	1	0	0	0	1	1
Enfs31	PF1	Rectal	Pig	Enterococcus faecalis	E15, TET30, CIP5, C30, LZD30, CN10, CN120	0	0	0	1	1	1	0	1	1	1	1	0	1	0	0	0	0	0	0	0	1	1	1	0	0	0	0	0	0	1	0	0	0	1	0
P.En098	SF1	Nasal	Human	Enterococcus faecalis	E15, TET30, CIP5, ENR5, C30, LZD30, CN10, CN120	0	0	0	1	1	1	1	1	1	1	1	0	1	1	0	0	0	0	0	0	1	0	1	0	0	0	0	0	0	0	0	0	0	0	0
P.En112	SF1	Nasal	Human	Enterococcus faecalis	AMP10, E15, TET30, CIP5, ENR5, C30, LZD30, CN10	1	0	0	1	1	1	1	1	1	1	0	0	1	1	1	1	1	0	0	0	0	0	1	0	0	0	0	0	0	0	0	0	0	0	0
P.En214	SF2	Urine	Human	Enterococcus faecalis	E15, TET30, CIP5, ENR5, C30, LZD30, CN10	0	0	0	1	1	1	1	1	1	1	0	0	1	1	0	0	0	0	0	0	1	1	1	0	0	0	0	0	0	1	0	0	0	1	1
P.En215	SF2	Urine	Human	Enterococcus faecalis	E15, TET30, CIP5, ENR5, C30, LZD30, CN10	0	0	0	1	1	1	1	1	1	1	0	0	1	1	1	1	1	0	0	0	1	1	1	0	0	0	0	0	0	1	0	0	0	1	1
P.En217	SF2	Urine	Human	Enterococcus faecalis	E15, TET30, CIP5, ENR5, C30, LZD30, CN10	0	0	0	1	1	1	1	1	1	1	0	0	1	1	1	1	0	0	1	0	1	1	1	0	0	0	0	1	0	1	0	0	0	1	1
Enfs148	PF5	Rectal	Pig	Enterococcus faecalis	E15, TET30, CIP5, C30, LZD30, CN10, CN120	0	0	0	1	1	1	0	1	1	1	1	1	1	1	0	0	0	0	0	0	1	1	1	0	0	0	0	0	0	1	0	0	0	1	0
Enfs81	PF2	Fecal	Pig	Enterococcus faecalis	E15, TET30, CIP5, C30, LZD30, CN10, CN120	0	0	0	1	1	1	0	1	1	1	1	0	1	1	1	1	0	0	1	0	1	1	1	0	0	0	0	1	0	1	0	0	0	1	0
Enfs82	PF2	Fecal	Pig	Enterococcus faecalis	E15, TET30, CIP5, C30, CN10, CN120	0	0	0	1	1	1	0	1	0	1	1	0	1	1	1	0	0	0	1	0	1	1	1	0	0	0	0	1	0	1	0	0	0	1	0
Enfs18	PF4	Rectal	Pig	Enterococcus faecalis	E15, TET30, C30, CN10	0	0	0	1	1	0	0	1	0	1	0	0	1	1	1	1	1	0	0	0	1	1	1	0	0	0	0	0	0	1	0	0	0	1	0
Enfs23	PF1	Fecal	Pig	Enterococcus faecalis	E15, TET30, CIP5, C30, LZD30, CN10, CN120	0	0	0	1	1	1	0	1	1	1	1	0	0	0	0	0	0	0	0	0	1	1	1	0	0	0	0	0	0	1	0	0	0	1	0
Enfs24	PF1	Fecal	Pig	Enterococcus faecalis	E15, TET30, CIP5, C30, CN10, CN120	0	0	0	1	1	1	0	1	0	1	1	0	1	0	1	0	0	0	1	0	1	1	1	0	0	0	0	0	0	0	0	0	0	1	1
Enfs25	PF1	Rectal	Pig	Enterococcus faecalis	E15, TET30, CIP5, C30, CN10, CN120	0	0	0	1	1	1	0	1	0	1	1	1	1	1	1	1	1	0	1	0	1	1	1	0	0	0	0	1	0	1	0	0	0	1	0
Enfs26	PF1	Rectal	Pig	Enterococcus faecalis	E15, TET30, CIP5, C30, CN10, CN120	0	0	0	1	1	1	0	1	0	1	1	1	1	0	1	1	1	0	1	0	1	1	1	0	0	0	0	1	0	1	0	0	0	1	0
Enfs27	PF1	Rectal	Pig	Enterococcus faecalis	E15, TET30, CIP5, C30, LZD30, CN10, CN120	0	0	0	1	1	1	0	1	1	1	1	0	1	1	1	1	0	0	1	0	1	1	1	0	0	0	0	0	0	1	0	0	0	1	0
Enfs29	PF1	Rectal	Pig	Enterococcus faecalis	E15, TET30, CIP5, C30, LZD30, CN10, CN120	0	0	0	1	1	1	0	1	1	1	1	1	1	0	1	1	0	0	0	0	1	1	1	0	0	0	0	1	0	1	0	0	0	1	1
Enfs30	PF1	Rectal	Pig	Enterococcus faecalis	E15, TET30, CIP5, C30, LZD30, CN10, CN120	0	0	0	1	1	1	0	1	1	1	1	0	1	1	1	0	0	0	1	0	1	1	1	0	0	0	0	1	0	1	0	0	0	1	0
Enfs129	PF2	Rectal	Pig	Enterococcus faecalis	E15, TET30, CIP5, C30, LZD30, CN10, CN120	0	0	0	1	1	1	0	1	1	1	1	0	1	1	1	0	0	0	1	0	1	1	1	0	0	0	0	0	0	0	0	0	0	1	1
Enfs83	PF2	Fecal	Pig	Enterococcus faecalis	E15, TET30, CIP5, C30, LZD30, CN10, CN120	0	0	0	1	1	1	0	1	1	1	1	0	1	1	0	0	0	0	1	0	1	1	1	0	0	0	0	0	0	1	0	0	0	1	0
Enfs84	PF2	Fecal	Pig	Enterococcus faecalis	E15, TET30, CIP5, C30, CN10, CN120	0	0	0	1	1	1	0	1	0	1	1	0	1	0	0	0	0	0	1	0	1	1	1	0	0	0	0	0	0	1	0	0	0	1	0
Enfs126	PF2	Rectal	Pig	Enterococcus faecalis	E15, TET30, CIP5, C30, LZD30, CN10, CN120	0	0	0	1	1	1	0	1	1	1	1	0	1	1	0	0	0	0	1	0	1	0	1	0	0	0	0	0	0	0	0	0	0	0	1
Enfs72	PF1	Oral	Pig	Enterococcus faecalis	E15, TET30, CIP5, C30, CN10	0	0	0	1	1	1	0	1	0	1	0	0	1	1	1	1	1	0	1	0	1	1	1	0	0	0	0	0	0	1	0	0	0	1	0
Enfs16	PF4	Fecal	Pig	Enterococcus faecalis	E15, TET30, C30, CN10	0	0	0	1	1	0	0	1	0	1	0	1	1	0	1	1	0	0	0	0	1	1	1	0	0	0	0	1	0	1	0	0	0	1	1
Enfs50	PF1	Rectal	Pig	Enterococcus faecalis	E15, TET30, CIP5, C30, LZD30, CN10	0	0	0	1	1	1	0	1	1	1	0	1	1	1	1	1	0	0	1	0	1	1	1	0	0	0	0	0	0	1	0	0	0	1	0
Enfs112	PF4	Urine	Human	Enterococcus faecalis	E15, TET30, CIP5, C30, LZD30, CN10, CN120	0	0	0	1	1	1	0	1	1	1	1	0	1	1	1	0	1	0	1	0	1	1	1	0	0	0	0	1	0	1	0	0	0	1	1
P.En092	SF1	Nasal	Human	Enterococcus faecalis	TEC30, E15, TET30, CIP5, ENR5, C30, LZD30, CN10, CN120	0	0	1	1	1	1	1	1	1	1	1	0	1	1	1	0	0	0	1	0	1	1	1	0	0	0	0	0	1	0	0	0	0	1	1
P.En093	SF1	Nasal	Human	Enterococcus faecalis	E15, CIP5, ENR5, C30, LZD30, CN10, CN120	0	0	0	1	0	1	1	1	1	1	1	0	1	1	1	0	0	0	1	0	1	1	1	0	0	0	0	0	1	0	0	0	0	1	1
Enfs17	PF4	Rectal	Pig	Enterococcus faecalis	E15, TET30, C30, CN10	0	0	0	1	1	0	0	1	0	1	0	1	1	0	0	0	0	0	0	0	1	1	1	0	0	0	0	0	0	0	0	0	0	1	1
P.En062	SF1	Rectal	Pig	Enterococcus faecalis	E15, TET30, CIP5, ENR5, C30, CN10, CN120	0	0	0	1	1	1	1	1	0	1	1	0	1	1	0	0	0	0	0	0	1	1	1	0	0	0	0	0	0	1	0	0	0	1	1
Enfs94	PF1	Fecal	Human	Enterococcus faecalis	E15, TET30, CIP5, LZD30, CN10	0	0	0	1	1	1	0	0	1	1	0	0	1	1	1	1	0	0	1	0	1	1	1	0	0	0	0	1	0	1	0	0	0	1	1
P.En018	SF1	Oral	Pig	Enterococcus faecalis	E15, TET30, CIP5, ENR5, C30, CN10, CN120	0	0	0	1	1	1	1	1	0	1	1	0	1	1	1	0	0	0	1	0	1	1	1	0	0	0	0	1	0	0	0	0	0	1	1
P.En070	SF1	Rectal	Pig	Enterococcus faecalis	E15, TET30, CIP5, C30, CN10, CN120	0	0	0	1	1	1	0	1	0	1	1	0	1	0	1	0	1	0	1	0	1	1	1	0	0	0	0	1	0	1	0	0	0	1	1
P.En071	SF1	Rectal	Pig	Enterococcus faecalis	E15, TET30, CIP5, C30, LZD30, CN10, CN120	0	0	0	1	1	1	0	1	1	1	1	0	1	1	1	0	0	0	1	0	1	1	1	0	0	0	0	0	0	0	0	0	0	1	1
P.En006	SF1	Oral	Pig	Enterococcus faecalis	E15, TET30, CIP5, C30, CN10, CN120	0	0	0	1	1	1	0	1	0	1	1	0	1	1	1	1	1	0	1	0	1	1	1	0	0	0	0	0	0	1	0	0	0	1	1
P.En003	SF1	Rectal	Pig	Enterococcus faecalis	E15, TET30, CIP5, C30, LZD30, CN10, CN120	0	0	0	1	1	1	0	1	1	1	1	0	1	1	1	1	0	0	1	0	1	1	1	0	0	0	0	1	0	1	0	0	0	1	1
P.En008	SF1	Rectal	Pig	Enterococcus faecalis	E15, TET30, CIP5, C30, CN10, CN120	0	0	0	1	1	1	0	1	0	1	1	0	1	1	0	0	0	0	1	0	1	1	1	0	0	0	0	0	0	1	0	0	0	1	1
Enfs32	PF1	Rectal	Pig	Enterococcus faecalis	E15, TET30, CIP5, C30, LZD30, CN10, CN120	0	0	0	1	1	1	0	1	1	1	1	1	1	0	1	0	1	0	0	0	1	1	1	0	0	0	0	1	0	1	0	0	0	1	1
Enfs33	PF1	Rectal	Pig	Enterococcus faecalis	E15, TET30, CIP5, C30, CN10	0	0	0	1	1	1	0	1	0	1	0	1	1	0	1	0	1	0	0	0	1	1	1	0	0	0	0	1	0	1	0	0	0	1	1
Enfs102	PF4	Urine	Human	Enterococcus faecalis	E15, TET30, C30, LZD30, CN10	0	0	0	1	1	0	0	1	1	1	0	1	1	1	0	0	0	0	1	0	0	1	1	0	0	0	0	0	0	0	0	0	0	0	1
Enfs105	PF4	Urine	Human	Enterococcus faecalis	E15, TET30, CIP5, C30, LZD30, CN10, CN120	0	0	0	1	1	1	0	1	1	1	1	0	1	0	1	0	0	0	1	0	1	1	1	0	0	0	0	1	0	1	0	0	0	1	0
Enfs106	PF4	Urine	Human	Enterococcus faecalis	E15, TET30, CIP5, C30, LZD30, CN10, CN120	0	0	0	1	1	1	0	1	1	1	1	0	1	1	1	0	1	0	1	0	1	1	1	0	0	0	0	1	0	1	0	0	0	1	1
Enfs107	PF4	Urine	Human	Enterococcus faecalis	E15, TET30, CIP5, C30, LZD30, CN10, CN120	0	0	0	1	1	1	0	1	1	1	1	0	1	1	1	1	0	0	0	0	1	1	1	0	0	0	0	0	0	1	0	0	0	1	0
Enfs152	PF4	Urine	Human	Enterococcus faecalis	E15, TET30, CIP5, C30, LZD30, CN10, CN120	0	0	0	1	1	1	0	1	1	1	1	0	1	0	0	0	0	0	0	0	1	1	1	0	0	0	0	0	0	1	0	0	0	1	0
Enfs95	PF4	Urine	Human	Enterococcus faecalis	E15, TET30, CIP5, C30, LZD30, CN10, CN120	0	0	0	1	1	1	0	1	1	1	1	0	1	1	1	0	0	0	1	0	1	1	1	0	0	0	0	0	1	0	0	0	0	1	1
Enfs51	PF2	Fecal	Pig	Enterococcus faecalis	E15, TET30, CIP5, C30, LZD30, CN10, CN120	0	0	0	1	1	1	0	1	1	1	1	0	1	1	1	0	1	0	0	1	1	1	1	0	0	0	0	1	0	0	0	0	0	0	1
Enfs52	PF2	Fecal	Pig	Enterococcus faecalis	E15, TET30, CIP5, C30, CN10, CN120	0	0	0	1	1	1	0	1	0	1	1	0	1	1	1	0	0	0	0	1	1	1	1	0	0	0	0	0	0	0	0	0	0	1	1
Enfs58	PF2	Fecal	Pig	Enterococcus faecalis	E15, TET30, CIP5, C30, CN10, CN120	0	0	0	1	1	1	0	1	0	1	1	0	1	1	1	1	0	0	1	0	1	1	1	0	0	0	0	0	0	1	0	0	0	1	1
Enfs63	PF2	Oral	Pig	Enterococcus faecalis	E15, TET30, CIP5, C30, CN10, CN120	0	0	0	1	1	1	0	1	0	1	1	0	1	1	1	1	0	0	1	0	1	1	1	0	0	0	0	1	0	1	0	0	0	1	1
Enfs57	PF2	Fecal	Pig	Enterococcus faecalis	E15, TET30, CIP5, C30, LZD30, CN10	0	0	0	1	1	1	0	1	1	1	0	0	1	1	1	1	0	0	0	0	1	1	1	0	0	0	0	0	0	0	0	0	0	1	1
Enfs90	PF3	Fecal	Pig	Enterococcus faecalis	E15, TET30, CIP5, C30, LZD30, CN10	0	0	0	1	1	1	0	1	1	1	0	0	1	0	1	0	0	0	1	0	1	1	1	0	0	0	0	0	0	1	0	0	0	1	0
Enfs55	PF2	Fecal	Pig	Enterococcus faecalis	E15, TET30, CIP5, C30, LZD30, CN10, CN120	0	0	0	1	1	1	0	1	1	1	1	0	1	1	1	1	0	0	0	1	1	1	1	0	0	0	0	0	0	0	0	0	0	1	1
Enfs59	PF2	Fecal	Pig	Enterococcus faecalis	E15, TET30, CIP5, C30, CN10, CN120	0	0	0	1	1	1	0	1	0	1	1	0	1	1	1	1	0	0	1	0	1	1	1	0	0	0	0	0	0	1	0	0	0	1	1
Enfs60	PF2	Fecal	Pig	Enterococcus faecalis	E15, TET30, CIP5, C30, CN10	0	0	0	1	1	1	0	1	0	1	0	0	1	1	1	1	0	0	1	0	1	1	1	0	0	0	0	0	0	1	0	0	0	1	1
Enfs64	PF2	Oral	Pig	Enterococcus faecalis	E15, TET30, CIP5, C30, LZD30, CN10	0	0	0	1	1	1	0	1	0	1	0	0	1	1	1	1	0	0	1	0	1	1	1	0	0	0	0	1	0	1	0	0	0	1	1
Enfs65	PF2	Oral	pig	Enterococcus faecalis	E15, TET30, CIP5, C30, LZD30, CN10	0	0	0	1	1	1	0	1	1	1	0	0	1	0	0	0	0	0	1	0	1	1	1	0	0	0	0	1	0	1	0	0	0	1	0
Enfs91	PF1	Oral	Pig	Enterococcus faecalis	E15, TET30, CIP5, C30, LZD30, CN10	0	0	0	1	1	1	0	1	1	1	0	0	1	0	0	0	0	0	1	0	1	1	1	0	0	0	0	1	0	1	0	0	0	1	0
Enfs88	PF3	Fecal	Pig	Enterococcus faecalis	E15, TET30, CIP5, C30, LZD30, CN10,	0	0	0	1	1	1	0	1	1	1	0	0	1	1	1	1	0	0	1	0	1	1	1	0	0	0	0	1	0	1	0	0	0	1	1
Enfs43	PF1	Rectal	Pig	Enterococcus faecalis	E15, TET30, CIP5, C30, CN10	0	0	0	1	1	1	0	1	0	1	0	0	1	1	0	0	0	0	1	0	1	1	1	0	0	0	0	0	0	1	0	0	0	1	0
Enfs46	PF1	Rectal	Pig	Enterococcus faecalis	E15, TET30, CIP5, C30, LZD30, CN10	0	0	0	1	1	1	0	1	1	1	0	0	1	1	1	1	1	0	0	0	1	0	1	0	0	0	0	1	0	1	0	0	0	1	0
Enfs131	PF3	Rectal	Pig	Enterococcus faecalis	E15, TET30, CIP5, C30, LZD30, CN10	0	0	0	1	1	1	0	1	1	1	0	0	0	0	1	1	1	0	0	0	1	1	1	0	0	0	0	0	0	1	0	0	0	1	0
Enfs92	PF1	Oral	Pig	Enterococcus faecalis	E15, TET30, CIP5, C30, CN10	0	0	0	1	1	1	0	1	0	1	0	0	1	0	0	0	0	0	1	0	1	1	1	0	0	0	0	0	0	1	0	0	0	1	0
Enfs119	PF2	Rectal	Pig	Enterococcus faecalis	E15, TET30, CIP5, C30, LZD30, CN10	0	0	0	1	1	1	0	1	1	1	0	0	1	0	1	1	1	0	1	0	1	0	1	0	0	0	0	1	0	1	0	0	0	1	1
Enfs120	PF2	Rectal	Pig	Enterococcus faecalis	E15, TET30, CIP5, C30, LZD30, CN10, CN120	0	0	0	1	1	1	0	1	1	1	1	1	1	1	0	0	0	0	1	0	1	0	1	0	0	0	0	0	0	0	0	0	0	1	1
Enfs122	PF2	Rectal	Pig	Enterococcus faecalis	E15, TET30, CIP5, C30, LZD30, CN10, CN120	0	0	0	1	1	1	0	1	1	1	1	0	1	1	1	1	1	0	1	0	1	1	1	0	0	0	0	1	0	0	0	0	0	1	1
Enfs123	PF2	Rectal	Pig	Enterococcus faecalis	E15, TET30, CIP5, C30, LZD30, CN10, CN120	0	0	0	1	1	1	0	1	1	1	1	0	1	1	0	0	0	0	1	0	1	1	1	0	0	0	0	0	0	1	0	0	0	1	1
Enfs124	PF2	Rectal	Pig	Enterococcus faecalis	E15, TET30, CIP5, C30, LZD30, CN10, CN120	0	0	0	1	1	1	0	1	1	1	1	1	1	1	0	0	0	0	1	0	1	1	1	0	0	0	0	0	0	0	0	0	0	0	1
Enfs125	PF2	Rectal	Pig	Enterococcus faecalis	E15, TET30, CIP5, C30, LZD30, CN10	0	0	0	1	1	1	0	1	1	1	0	0	1	1	1	0	0	0	1	0	1	1	1	0	0	0	0	0	0	0	0	0	0	1	1
Enfs153	PF4	Nasal	Human	Enterococcus faecalis	P10, E15, TET30, CIP5, C30, LZD30, CN10, CN120	0	1	0	1	1	1	0	1	1	1	1	0	1	1	1	1	0	0	0	0	1	0	1	0	0	0	0	0	0	0	0	0	0	1	1
Enfs116	PF2	Rectal	Pig	Enterococcus faecalis	E15, TET30, CIP5, C30, LZD30, CN10, CN120	0	0	0	1	1	1	0	1	1	1	1	0	1	1	1	0	1	0	1	0	1	1	1	0	0	0	0	1	0	1	0	0	0	1	1
Enfs103	PF2	Floor	Environment	Enterococcus faecalis	E15, TET30, CIP5, C30, LZD30, CN10, CN120	0	0	0	1	1	1	0	1	1	1	1	0	1	1	1	0	0	0	0	0	1	1	1	0	0	0	0	1	0	0	0	0	0	1	1
Enfs71	PF1	Oral	Pig	Enterococcus faecalis	P10, E15, TET30, CIP5, C30, CN10	0	1	0	1	1	1	0	1	0	1	0	0	1	0	0	0	0	0	1	0	1	1	1	0	0	0	0	1	0	1	0	0	0	1	0
Enfs76	PF2	Oral	Pig	Enterococcus faecalis	E15, TET30, CIP5, C30, LZD30, CN10, CN120	0	0	0	1	1	1	0	1	1	1	1	0	1	0	1	0	0	0	1	0	1	1	1	0	0	0	0	0	0	1	0	0	0	1	1
Enfs67	PF1	Oral	Pig	Enterococcus faecalis	E15, TET30, CIP5, C30, CN10, CN120	0	0	0	1	1	1	0	1	0	1	1	0	1	1	1	1	0	0	1	0	1	1	1	0	0	0	0	0	0	1	0	0	0	1	1
Enfs69	PF1	Oral	Pig	Enterococcus faecalis	E15, TET30, CIP5, C30, CN10, CN120	0	0	0	1	1	1	0	1	0	1	1	0	1	1	1	1	0	0	1	0	1	1	1	0	0	0	0	0	0	1	0	0	0	1	1
Enfs70	PF1	Oral	Pig	Enterococcus faecalis	E15, TET30, CIP5, C30, LZD30, CN10, CN120	0	0	0	1	1	1	0	1	1	1	1	0	1	1	1	1	0	0	1	0	1	1	1	0	0	0	0	0	0	1	0	0	0	1	1
P.En203	SF2	Rectal	Pig	Enterococcus faecalis	E15, TET30, CIP5, C30, LZD30, CN10, CN120	0	0	0	1	1	1	0	1	1	1	1	0	1	1	1	0	0	0	0	0	1	1	1	0	0	0	0	1	0	0	0	0	0	0	1
P.En204	SF2	Oral	Pig	Enterococcus faecalis	E15, TET30, CIP5, C30, LZD30, CN10, CN120	0	0	0	1	1	1	0	1	1	1	1	0	0	0	1	1	1	0	0	0	1	1	1	0	0	0	0	0	0	1	0	0	0	1	1
P. En 120	SF2	Nasal	Human	Enterococcus faecalis	E15, TET30, CIP5, ENR5, C30, LZD30, CN10, CN120	0	0	0	1	1	1	1	1	1	1	1	0	1	0	1	1	1	0	1	0	1	1	1	0	0	0	0	0	0	1	0	0	0	1	1
P.En229	SF1	Fecal	Pig	Enterococcus faecalis	E15, TET30, CIP5, C30, LZD30, CN10, CN120	0	0	0	1	1	1	0	1	1	1	1	0	1	0	1	0	0	0	0	0	1	1	1	0	0	0	0	0	0	1	0	0	0	1	1
Enfs61	PF4	Oral	Pig	Enterococcus faecalis	TEC30, E15, TET30, CIP5, C30, LZD30, CN10, CN120	0	0	1	1	1	1	0	1	1	1	1	0	1	1	1	1	0	0	1	0	1	1	1	0	0	0	0	0	0	1	0	0	0	1	1
Enfs62	PF5	Oral	Pig	Enterococcus faecalis	E15, TET30, CIP5, C30, LZD30, CN10	0	0	0	1	1	1	0	1	1	1	0	0	1	1	1	1	0	0	1	0	1	1	1	0	0	0	0	0	0	1	0	0	0	1	1
Enfs56	PF2	Fecal	Pig	Enterococcus faecalis	E15, TET30, CIP5, C30, CN10	0	0	0	1	1	1	0	1	0	1	0	0	1	0	0	0	0	0	1	0	1	1	1	0	0	0	0	1	0	1	0	0	0	1	0
Enfs98	PF3	Water	Environment	Enterococcus faecalis	E15, TET30, CIP5, C30, CN10	0	0	0	1	1	1	0	1	0	1	0	0	1	1	1	1	0	0	1	0	1	1	1	0	0	0	0	1	0	1	0	0	0	1	1
Enfs87	PF3	Fecal	Pig	Enterococcus faecalis	E15, TET30, CIP5, C30, LZD30, CN10	0	0	0	1	1	1	0	1	1	1	0	0	1	1	1	1	0	0	1	0	1	1	1	0	0	0	0	0	0	1	0	0	0	1	1
Enfs117	PF2	Rectal	Pig	Enterococcus faecalis	E15, TET30, CIP5, C30, LZD30, CN10	0	0	0	1	1	1	0	1	1	1	0	1	0	0	0	0	0	0	0	0	1	1	1	0	0	0	0	0	0	1	0	0	0	1	0
Enfs130	PF3	Rectal	Pig	Enterococcus faecalis	E15, TET30, CIP5, C30, LZD30, CN10, CN120	0	0	0	1	1	1	0	1	1	1	1	0	1	1	1	0	0	0	1	0	1	1	1	0	0	0	0	1	0	0	0	0	0	1	1
Enfs137	PF3	Rectal	Pig	Enterococcus faecalis	E15, TET30, CIP5, C30, CN10, CN120	0	0	0	1	1	1	0	1	0	1	1	1	0	1	1	1	0	0	1	0	1	1	1	0	0	0	0	1	0	1	0	0	0	1	0
Enfs135	PF3	Rectal	Pig	Enterococcus faecalis	E15, TET30, CIP5, C30, CN10, CN120	0	0	0	1	1	1	0	1	0	1	1	0	1	1	0	0	0	0	1	0	1	1	1	0	0	0	0	0	0	0	0	0	0	1	1
Enfs136	PF3	Rectal	Pig	Enterococcus faecalis	E15, TET30, CIP5, C30, CN10, CN120	0	0	0	1	1	1	0	1	0	1	1	1	1	1	1	1	0	0	1	0	1	1	1	0	0	0	0	1	0	1	0	0	0	1	1
P.En012	SF1	Oral	Pig	Enterococcus faecalis	E15, TET30, CIP5, C30, CN10, CN120	0	0	0	1	1	1	0	1	0	1	1	0	1	0	1	0	0	0	1	0	1	1	1	0	0	0	0	0	0	0	0	0	0	1	1
P.En046	SF1	Rectal	Pig	Enterococcus faecalis	E15, TET30, CIP5, ENR5, C30, CN10, CN120	0	0	0	1	1	1	1	1	0	1	1	0	1	1	0	0	0	0	1	0	1	1	1	0	0	0	0	0	0	1	0	0	0	1	1
P.En042	SF1	Rectal	Pig	Enterococcus faecalis	E15, TET30, CIP5, C30, LZD30, CN10, CN120	0	0	0	1	1	1	0	1	1	1	1	0	1	0	1	1	1	0	1	0	1	1	1	0	0	0	0	0	0	0	0	0	0	0	0
P.En249	SF2	Fecal	Pig	Enterococcus faecalis	E15, TET30, CIP5, ENR5, C30, LZD30, CN10, CN120	0	0	0	1	1	1	1	1	1	1	1	0	1	0	0	0	0	0	0	0	1	1	1	0	0	0	0	1	0	1	0	0	0	1	1
P.En250	SF2	Fecal	Pig	Enterococcus faecalis	E15, TET30, CIP5, ENR5, C30, LZD30, CN10, CN120	0	0	0	1	1	1	1	1	1	1	1	0	1	1	1	1	1	0	0	0	1	0	1	0	0	0	0	1	0	1	0	0	0	1	1
P.En251	SF2	Fecal	Pig	Enterococcus faecalis	AMP10, P10, E15, TET30, CIP5, C30, LZD30, CN10, CN120	1	1	0	1	1	1	0	1	1	1	1	0	1	0	1	1	1	0	1	0	1	1	1	0	0	1	0	1	0	1	0	0	0	1	0
Enfs149	PF5	Rectal	Pig	Enterococcus faecalis	E15, TET30, CIP5, C30	0	0	0	1	1	1	0	1	0	0	0	1	1	0	1	1	1	0	0	0	1	1	1	0	0	0	0	0	0	1	0	0	0	1	0
P.En057	SF1	Oral	Pig	Enterococcus faecalis	E15, TET30, CIP5, ENR5, C30, CN10, CN120	0	0	0	1	1	1	1	1	0	1	1	0	1	1	1	0	1	0	1	0	1	1	1	0	0	0	0	1	0	1	0	0	0	1	1
Enfs150	PF5	Rectal	Pig	Enterococcus faecalis	E15, TET30, CIP5, C30, LZD30, CN10	0	0	0	1	1	1	0	1	1	1	0	0	1	1	1	1	0	0	0	0	1	1	1	0	0	0	0	1	0	1	0	0	0	1	0
P.En074	SF1	Rectal	Pig	Enterococcus faecalis	E15, TET30, CIP5, C30, CN10, CN120	0	0	0	1	1	1	0	1	0	1	1	0	1	0	0	0	0	0	1	0	1	1	1	0	0	0	0	0	0	0	0	0	0	1	1
Enfs97	PF4	Nasal	Human	Enterococcus faecalis	E15, TET30, C30, LZD30, CN10, CN120	0	0	0	1	1	0	0	1	1	1	1	0	1	1	1	0	0	0	1	0	1	1	1	0	0	0	0	0	1	0	0	0	0	1	1
P.En079	SF1	Oral	Pig	Enterococcus faecalis	E15, TET30, CIP5, C30, LZD30, CN10	0	0	0	1	1	1	0	1	1	1	0	0	1	0	0	0	0	0	1	0	1	1	1	0	0	0	0	1	0	1	0	0	0	1	0
Enfs134	PF3	Rectal	Pig	Enterococcus faecalis	E15, TET30, CIP5, C30, CN10	0	0	0	1	1	1	0	1	0	1	0	1	1	1	1	1	0	0	1	0	1	1	1	0	0	0	0	1	0	1	0	0	0	1	0
Enfs96	PF4	Nasal	Human	Enterococcus faecalis	E15, TET30, C30, LZD30, CN10, CN120	0	0	0	1	1	0	0	1	1	1	1	0	1	0	1	0	0	0	1	0	1	1	1	0	0	0	0	0	0	1	0	0	0	1	1
Enfs99	PF1	Fence	Environment	Enterococcus faecalis	E15, TET30, C30, LZD30, CN10, CN120	0	0	0	1	1	0	0	1	1	1	1	0	1	1	1	1	0	0	1	0	1	1	1	0	0	0	0	1	0	1	0	0	0	1	1
Enfs104	PF3	Nasal	Human	Enterococcus faecalis	E15, TET30, CIP5, C30, LZD30, CN10, CN120	0	0	0	1	1	1	0	1	1	1	1	0	1	0	1	1	1	0	1	0	1	0	1	0	0	0	0	1	0	1	0	0	0	1	1
Enfs111	PF5	Urine	Human	Enterococcus faecalis	E15, TET30, CIP5, C30, LZD30, CN10, CN120	0	0	0	1	1	1	0	1	1	1	1	0	0	0	0	0	0	0	1	1	1	1	1	0	0	0	0	0	0	1	0	0	0	1	0
Enfs101	PF3	Urine	Human	Enterococcus faecalis	E15, TET30, CIP5, C30, LZD30, CN10, CN120	0	0	0	1	1	1	0	1	1	1	1	0	1	0	1	1	1	0	1	0	1	0	1	0	0	0	0	0	0	1	0	0	0	1	1
Enfs75	PF1	Oral	Pig	Enterococcus faecalis	E15, TET30, C30, LZD30, CN10, CN120	0	0	0	1	1	0	0	1	1	1	1	0	1	1	1	1	0	0	1	0	1	1	1	0	0	0	0	0	0	1	0	0	0	1	1
Enfs73	PF1	Oral	Pig	Enterococcus faecalis	E15, TET30, C30, LZD30, CN10, CN120	0	0	0	1	1	0	0	1	1	1	1	0	1	0	0	0	0	0	1	0	1	1	1	0	0	0	0	0	0	1	0	0	0	1	0
Enfs74	PF1	Oral	Pig	Enterococcus faecalis	E15, TET30, C30, LZD30, CN10, CN120	0	0	0	1	1	0	0	1	1	1	1	0	1	1	1	1	0	0	1	0	1	1	1	0	0	0	0	0	0	1	0	0	0	1	1
P.En022	SF1	Oral	Pig	Enterococcus faecalis	E15, TET30, CIP5, C30, LZD30, CN10, CN120	0	0	0	1	1	1	0	1	1	1	1	0	1	1	1	0	0	0	1	0	1	1	1	0	0	0	0	1	0	0	0	0	0	1	1
P.En028	SF1	Oral	Pig	Enterococcus faecalis	E15, TET30, CIP5, ENR5, C30, LZD30, CN10, CN120	0	0	0	1	1	1	1	1	1	1	1	0	1	1	0	0	0	0	1	0	1	1	1	0	0	0	0	0	0	1	0	0	0	1	0
P.En024	SF1	Oral	Pig	Enterococcus faecalis	E15, TET30, CIP5, ENR5, C30, LZD30, CN10, CN120	0	0	0	1	1	1	1	1	1	1	1	0	1	0	0	0	0	0	1	0	1	1	1	0	0	0	0	0	0	1	0	0	0	1	0
Enfs128	PF2	Rectal	Pig	Enterococcus faecalis	E15, TET30, CIP5, C30, LZD30, CN10, CN120	0	0	0	1	1	1	0	1	1	1	1	0	1	1	1	0	0	0	1	0	1	1	1	0	0	0	0	1	0	0	0	0	0	1	1
P.En091	SF1	Rectal	Pig	Enterococcus faecalis	TEC30, E15, TET30, CIP5, ENR5, LZD30, CN10, CN120	0	0	1	1	1	1	1	0	1	1	1	0	0	0	0	0	0	0	1	0	1	1	1	0	0	0	0	0	0	0	0	0	0	1	0
P.En208	SF2	Oral	Pig	Enterococcus faecalis	E15, TET30	0	0	0	1	1	0	0	0	0	0	0	0	0	0	1	0	0	0	1	0	1	1	0	0	1	1	0	0	0	0	0	0	0	1	0
P.En083	SF1	Oral	Pig	Enterococcus faecalis	E15, TET30, CIP5, C30, LZD30, CN10, CN120	0	0	0	1	1	1	0	1	1	1	1	0	1	0	1	0	0	0	0	0	1	1	1	0	0	0	0	0	0	1	0	0	0	1	1
P.En284	SF1	Urine	Human	Enterococcus faecalis	E15, TET30, CIP5, ENR5, C30, LZD30, CN10, CN120	0	0	0	1	1	1	1	1	1	1	1	0	0	0	0	0	0	0	1	0	1	1	0	0	0	1	1	0	1	1	0	0	0	1	1
P.En094	SF1	Nasal	Human	Enterococcus faecalis	E15, TET30, CIP5, ENR5, C30, LZD30, CN10, CN120	0	0	0	1	1	1	1	1	1	1	1	0	1	0	1	1	1	0	1	0	1	1	1	0	0	0	0	0	0	1	0	0	0	1	1
P.En287	SF1	Urine	Human	Enterococcus faecalis	E15, TET30, CIP5, ENR5, C30, LZD30, CN10, CN120	0	0	0	1	1	1	1	1	1	1	1	0	1	0	0	0	0	0	0	0	1	1	1	0	0	0	0	0	0	1	0	0	0	1	1
P.En275	SF1	Urine	Human	Enterococcus faecalis	E15, TET30, CIP5, ENR5, C30, LZD30, CN10, CN120	0	0	0	1	1	1	1	1	1	1	1	1	0	1	1	1	1	0	0	0	1	0	1	0	0	0	0	1	0	1	0	0	0	1	1
P.En283	SF1	Urine	Human	Enterococcus faecalis	E15, TET30, CIP5, ENR5, C30, LZD30, CN10, CN120	0	0	0	1	1	1	1	1	1	1	1	0	1	1	1	1	0	0	0	0	1	0	1	0	0	0	0	1	0	1	0	0	0	1	1
P.En192	SF2	Rectal	Pig	Enterococcus faecalis	E15, TET30, CIP5, ENR5, C30, LZD30, CN10, CN120	0	0	0	1	1	1	1	1	1	1	1	0	1	1	1	0	1	0	1	0	1	1	1	0	0	0	0	1	0	1	0	0	0	1	1
P.En195	SF2	Rectal	Pig	Enterococcus faecalis	E15, TET30, CIP5, C30, LZD30, CN10, CN120	0	0	0	1	1	1	0	1	1	1	1	0	1	0	0	0	0	0	1	0	1	1	1	0	0	0	0	0	0	1	0	0	0	1	0
P.En191	SF2	Oral	Pig	Enterococcus faecalis	E15, TET30, CIP5, C30, LZD30, CN10, CN120	0	0	0	1	1	1	0	1	1	1	1	0	1	1	0	0	0	0	0	0	0	1	0	0	0	0	0	0	0	0	0	0	0	0	1
P.En178	SF2	Rectal	Pig	Enterococcus faecalis	E15, TET30, CIP5, C30, LZD30, CN10, CN120	0	0	0	1	1	1	0	1	1	1	1	0	1	0	0	0	0	0	0	0	1	1	1	0	0	0	0	0	0	0	0	0	0	1	1
P.En187	SF2	Oral	Pig	Enterococcus faecalis	E15, TET30, CIP5, C30, LZD30, CN10, CN120	0	0	0	1	1	1	0	1	1	1	1	0	0	1	0	0	0	0	0	0	0	1	1	0	1	0	0	0	0	0	0	0	0	0	0
P.En197	SF2	Oral	Pig	Enterococcus faecalis	E15, TET30, CIP5, C30, LZD30, CN10, CN120	0	0	0	1	1	1	0	1	1	1	1	0	0	1	1	1	1	0	1	1	1	1	1	0	0	0	0	0	0	1	0	0	0	1	0
P.En145	SF2	Oral	Pig	Enterococcus faecalis	P10, E15, TET30, CIP5, C30, CN10, CN120	0	1	0	1	1	1	0	1	0	1	1	0	1	1	1	1	0	0	1	0	1	1	1	0	0	0	0	1	0	1	0	0	0	1	1
P.En180	SF2	Oral	Pig	Enterococcus faecalis	E15, TET30, CIP5, C30, LZD30, CN10, CN120	0	0	0	1	1	1	0	1	1	1	1	0	1	1	1	0	0	0	0	0	1	1	1	0	0	0	0	1	0	0	0	0	0	1	1
P.En182	SF2	Rectal	Pig	Enterococcus faecalis	E15, TET30, CIP5, C30, LZD30, CN10, CN120	0	0	0	1	1	1	0	1	1	1	1	0	0	1	0	0	0	0	1	0	1	1	1	0	0	0	0	0	0	0	0	0	0	1	0
P.En146	SF2	Rectal	Pig	Enterococcus faecalis	E15, TET30, CIP5, C30, LZD30, CN10, CN120	0	0	0	1	1	1	0	1	1	1	1	0	1	1	1	0	0	0	1	0	1	1	1	0	0	0	0	1	0	1	0	0	0	1	1
P.En147	SF2	Rectal	Pig	Enterococcus faecalis	E15, TET30, CIP5, C30, LZD30, CN10, CN120	0	0	0	1	1	1	0	1	1	1	1	0	1	0	1	0	0	0	1	0	1	1	1	0	0	0	0	1	0	1	0	0	0	1	0
P.En152	SF2	Oral	Pig	Enterococcus faecalis	E15, TET30, CIP5, C30, LZD30, CN10, CN120	0	0	0	1	1	1	0	1	1	1	1	1	1	1	1	1	0	0	0	0	1	1	1	0	0	0	0	1	0	1	0	0	0	1	1
P.En164	SF2	Rectal	Pig	Enterococcus faecalis	E15, TET30, CIP5, C30, LZD30, CN10	0	0	0	1	1	1	0	1	1	1	0	0	1	0	1	0	0	0	0	0	1	1	1	0	0	0	0	0	0	0	0	0	0	1	1
P.En201	SF2	Oral	Pig	Enterococcus faecalis	E15, TET30, CIP5, C30, LZD30, CN10	0	0	0	1	1	1	0	1	1	1	0	0	1	0	1	1	1	0	0	0	1	1	1	0	0	0	0	1	0	1	0	0	0	1	1
P.En168	SF2	Oral	Pig	Enterococcus faecalis	E15, TET30, CIP5, C30, LZD30, CN10, CN120	0	0	0	1	1	1	0	1	1	1	1	1	1	1	1	0	1	0	1	0	1	1	1	0	0	0	0	1	0	0	0	0	0	1	1
P.En170	SF2	Rectal	Pig	Enterococcus faecalis	E15, TET30, CIP5, ENR5, C30, LZD30, CN10, CN120	0	0	0	1	1	1	1	1	1	1	1	0	1	1	0	0	0	0	1	0	1	1	1	0	0	0	0	0	0	1	0	0	0	1	0
P.En172	SF2	Rectal	Pig	Enterococcus faecalis	E15, TET30, CIP5, ENR5, C30, LZD30, CN10, CN120	0	0	0	1	1	1	1	1	1	1	1	1	1	1	1	0	1	0	1	0	1	1	1	0	0	0	0	1	0	0	0	0	0	0	1
P.En173	SF2	Rectal	Pig	Enterococcus faecalis	E15, TET30, CIP5, C30, LZD30, CN10, CN120	0	0	0	1	1	1	0	1	1	1	1	1	1	0	0	0	0	0	0	0	1	1	1	0	0	0	0	0	0	0	0	0	0	1	1
P.En202	SF2	Rectal	Pig	Enterococcus faecalis	E15, TET30, CIP5, C30, LZD30, CN10, CN120	0	0	0	1	1	1	0	1	1	1	1	0	1	1	1	1	1	0	1	0	1	1	1	0	0	0	0	0	0	0	0	0	0	1	1
P.En181	SF2	Oral	Pig	Enterococcus faecalis	E15, TET30, CIP5, C30, LZD30, CN10, CN120	0	0	0	1	1	1	0	1	1	1	1	0	0	1	0	0	0	0	1	1	0	0	1	0	0	0	0	0	0	0	0	0	0	0	0
P.En186	SF2	Oral	Pig	Enterococcus faecalis	E15, TET30, CIP5, C30, LZD30, CN10, CN120	0	0	0	1	1	1	0	1	1	1	1	0	0	1	0	0	0	0	0	0	0	1	1	0	1	0	0	0	0	0	0	0	0	0	0
P.En174	SF2	Oral	Pig	Enterococcus faecalis	E15, TET30, CIP5, C30, LZD30, CN10, CN120	0	0	0	1	1	1	0	1	1	1	1	0	1	0	0	0	0	0	0	0	1	1	1	0	0	0	0	0	0	0	0	0	0	1	1
P.En142	SF2	Rectal	Pig	Enterococcus faecalis	E15, TET30, CIP5, C30, LZD30, CN10, CN120	0	0	0	1	1	1	0	1	1	1	1	0	1	0	1	1	1	0	1	0	1	1	1	0	0	0	0	0	0	1	0	0	0	1	1
P.En143	SF2	Rectal	Pig	Enterococcus faecalis	E15, TET30, CIP5, ENR5, C30, LZD30, CN10, CN120	0	0	0	1	1	1	1	1	1	1	1	0	1	1	1	0	0	0	1	0	1	1	1	0	0	0	0	0	0	0	0	0	0	1	1
P.En246	SF2	Fecal	Pig	Enterococcus faecalis	P10, E15, TET30, CIP5, ENR5, C30	0	1	0	1	1	1	1	1	0	0	0	0	0	0	0	0	0	0	0	0	1	1	1	0	0	0	0	0	0	1	0	0	0	1	1
P.En154	SF2	Rectal	Pig	Enterococcus faecalis	E15, TET30, CIP5, C30, LZD30, CN10, CN120	0	0	0	1	1	1	0	1	1	1	1	1	1	1	1	1	0	0	1	0	1	1	1	0	0	0	0	1	0	1	0	0	0	1	1
P.En155	SF2	Rectal	Pig	Enterococcus faecalis	E15, TET30, CIP5, ENR5, C30, LZD30, CN10, CN120	0	0	0	1	1	1	1	1	1	1	1	0	1	0	1	0	0	0	0	0	1	1	1	0	0	0	0	0	0	1	0	0	0	1	1
P.En148	SF2	Oral	Pig	Enterococcus faecalis	E15, TET30, CIP5, C30, LZD30, CN10, CN120	0	0	0	1	1	1	0	1	1	1	1	0	1	1	1	1	0	0	1	0	1	1	1	0	0	0	0	1	0	1	0	0	0	1	1
P.En150	SF2	Rectal	Pig	Enterococcus faecalis	E15, TET30, CIP5, ENR5, C30, LZD30, CN10, CN120	0	0	0	1	1	1	1	1	1	1	1	1	1	1	1	1	0	0	1	0	1	1	1	0	0	0	0	1	0	1	0	0	0	1	1
P.En029	SF1	Oral	Pig	Enterococcus faecalis	E15, TET30, CIP5, CN10, CN120	0	0	0	1	1	1	0	0	0	1	1	0	1	0	0	0	0	0	1	0	1	1	1	0	0	0	0	0	0	1	0	0	0	1	0
P.En207	SF2	Oral	Pig	Enterococcus faecalis	E15, TET30, C30	0	0	0	1	1	0	0	1	0	0	0	1	1	0	0	0	0	0	1	0	1	1	1	0	0	0	0	1	0	1	0	0	0	1	1
P.En244	SF2	Fecal	Pig	Enterococcus faecalis	E15, TET30, CIP5, ENR5, C30, CN10, CN120	0	0	0	1	1	1	1	1	0	1	1	0	1	1	1	0	0	0	1	0	1	1	1	0	0	0	0	0	0	1	0	0	0	1	0
P.En242	SF1	Fecal	Pig	Enterococcus faecalis	AMP10, P10, E15, TET30, CIP5, ENR5, C30, LZD30, CN10, CN120	1	1	0	1	1	1	1	1	1	1	1	0	0	0	1	0	0	0	0	0	0	0	0	0	0	0	0	0	0	0	0	0	0	0	0
P.En224	SF2	Fecal	Human	Enterococcus faecalis	E15, TET30, CIP5, ENR5, C30, CN10	0	0	0	1	1	1	1	1	0	1	0	0	1	0	0	0	0	0	1	0	1	1	1	0	0	0	0	0	0	1	0	0	0	1	0
P.En259	SF1	Fecal	Human	Enterococcus faecalis	E15, ENR5, C30	0	0	0	1	0	0	1	1	0	0	0	0	1	0	0	0	0	0	1	0	1	1	1	0	0	1	0	0	0	1	0	0	0	1	0
P.En052	SF1	Oral	Pig	Enterococcus faecalis	AMP10, P10, E15, TET30, CIP5, C30, CN10, CN120	1	1	0	1	1	1	0	1	0	1	1	0	1	0	1	0	0	0	1	0	1	1	1	0	0	0	0	1	0	1	0	0	0	1	0
P.En011	SF1	Oral	Pig	Enterococcus faecalis	E15, TET30, CIP5, CN10, CN120	0	0	0	1	1	1	0	0	0	1	1	0	1	0	0	0	0	0	1	0	1	1	1	0	0	0	0	0	0	0	0	0	0	1	0
P.En223	SF2	Fecal	Human	Enterococcus faecalis	E15, TET30, CIP5, ENR5, C30, CN10	0	0	0	1	1	1	1	1	0	1	0	0	0	1	1	1	0	0	1	0	1	0	1	0	0	0	0	0	1	1	0	0	0	0	1
P.En225	SF2	Fecal	Human	Enterococcus faecalis	TET30, CIP5, ENR5, C30, LZD30, CN10	0	0	0	0	1	1	1	1	1	1	0	0	1	0	1	0	0	0	1	0	1	1	1	0	0	0	0	0	0	1	0	0	0	1	0
P.En226	SF2	Fecal	Human	Enterococcus faecalis	E15, TET30, CIP5, ENR5, CN10	0	0	0	1	1	1	1	0	0	1	0	0	0	0	0	0	0	0	1	1	1	1	1	0	0	0	0	0	0	1	0	0	0	1	0
P.En243	SF2	Fecal	Pig	Enterococcus faecalis	AMP10, E15, TET30, CIP5, ENR5, C30, LZD30	1	0	0	1	1	1	1	0	1	0	0	0	1	0	0	0	0	0	1	0	1	1	1	0	0	0	0	0	0	1	0	0	0	1	0
P.En274	6	Urine	Human	Enterococcus faecium	E15, TET30, CIP5, ENR5, C30, LZD30, CN10, CN120	0	0	0	1	1	1	1	1	1	1	1	0	1	0	0	0	0	0	1	0	1	1	1	0	0	0	0	0	0	1	0	0	0	1	1
P.En277	6	Urine	Human	Enterococcus faecium	E15, TET30, CIP5, ENR5, C30, LZD30, CN10, CN120	0	0	0	1	1	1	1	1	1	1	1	0	1	0	0	0	0	0	1	0	1	1	1	0	0	0	0	0	0	1	0	0	0	1	1
P.En210	7	Rectal	Pig	Enterococcus faecium	AMP10, P10, E15, TET30, CIP5, C30, CN10	1	1	0	1	1	1	0	1	0	1	0	0	0	0	0	0	0	0	1	0	1	1	1	0	0	0	0	0	0	0	0	0	0	1	0
P.En233	6	Fecal	Pig	Enterococcus faecium	E15, TET30, CIP5, ENR5, C30, CN10, CN120	0	0	0	1	1	1	1	1	0	1	1	0	1	0	1	0	0	0	1	0	1	1	1	0	0	0	0	0	0	0	0	0	0	1	1
P.En238	6	Fecal	Pig	Enterococcus faecium	AMP10, P10, E15, TET30, CIP5, ENR5, C30, CN10	1	1	0	1	1	1	1	1	0	1	0	0	0	1	0	0	0	0	1	1	1	1	1	0	0	0	0	0	0	1	0	0	0	1	0
P.En239	6	Fecal	Pig	Enterococcus faecium	AMP10, P10, TEC30, E15, TET30, CIP5, C30, CN10	1	1	1	1	1	1	0	1	0	1	0	0	0	1	1	1	1	0	1	1	1	1	1	0	0	0	0	0	0	1	0	0	0	1	0
P.En240	6	Fecal	Pig	Enterococcus faecium	AMP10, P10, E15, TET30, CIP5, ENR5, C30, LZD30, CN10, CN120	1	1	0	1	1	1	1	1	1	1	1	0	0	1	1	1	1	0	1	1	1	1	1	0	0	0	0	0	0	1	0	0	0	1	0
P.En183	7	Rectal	Pig	Enterococcus faecium	E15, TET30, CIP5, C30, LZD30, CN10, CN120	0	0	0	1	1	1	0	1	1	1	1	0	1	0	0	0	0	0	1	0	1	1	1	0	0	0	0	0	0	1	0	0	0	1	0
P.En269	6	Urine	Human	Enterococcus faecium	E15, TET30, CIP5, ENR5, C30, LZD30, CN10, CN120	0	0	0	1	1	1	1	1	1	1	1	0	1	1	1	1	1	0	1	0	1	0	1	0	0	0	0	0	0	1	0	0	0	1	1
P.En272	6	Urine	Human	Enterococcus faecium	E15, TET30, CIP5, ENR5, C30, LZD30, CN10, CN120	0	0	0	1	1	1	1	1	1	1	1	0	1	0	0	0	0	0	1	0	1	0	1	0	0	0	0	0	0	1	0	0	0	1	1
Enfm19	4	Fecal	Human	Enterococcus faecium	TET30, CIP5, C30, CN10	0	0	0	0	1	1	0	1	0	1	0	0	0	0	0	0	0	0	0	0	0	1	1	0	0	0	0	0	0	0	0	0	0	0	0
Enfm22	2	Rectal	Pig	Enterococcus faecium	TET30, CIP5, C30, CN10	0	0	0	0	1	1	0	1	0	1	0	0	0	0	1	0	0	0	0	0	1	1	1	0	0	0	0	0	0	0	0	0	0	0	0
Enfm20	4	Fecal	Human	Enterococcus faecium	TET30, CIP5, C30, CN10	0	0	0	0	1	1	0	1	0	1	0	0	0	0	0	0	0	0	1	0	1	1	1	0	0	0	0	0	0	0	0	0	0	0	1
P.En234	6	Fecal	Pig	Enterococcus faecium	E15, TET30, CIP5, ENR5, C30, CN10, CN120	0	0	0	1	1	1	1	1	0	1	1	0	1	0	1	0	0	0	1	0	1	1	1	0	0	0	0	0	0	0	0	0	0	1	1
Enfm14	5	Rectal	Pig	Enterococcus faecium	P10, E15, TET30, CIP5, C30, CN10	0	1	0	1	1	1	0	1	0	1	0	0	0	0	0	0	0	0	1	0	1	1	1	0	0	0	0	0	0	1	0	1	1	1	0
Enfm21	1	Fecal	Human	Enterococcus faecium	E15, TET30, C30, CN10	0	0	0	1	1	0	0	1	0	1	0	0	0	0	0	1	0	0	1	0	1	1	1	0	0	0	0	0	0	0	0	0	0	0	0
Enfm06	2	Fecal	Pig	Enterococcus faecium	E15, TET30, CIP5, C30, CN10, CN120	0	0	0	1	1	1	0	1	0	1	1	0	0	0	0	0	0	0	0	1	1	1	1	0	0	0	0	0	0	1	0	1	1	1	0
Enfm23	2	Rectal	Pig	Enterococcus faecium	AMP10, E15, TET30, CIP5, C30, CN10	1	0	0	1	1	1	0	1	0	1	0	0	0	0	1	0	0	0	0	0	1	1	1	0	0	0	0	0	0	1	0	1	1	1	0
P.En209	7	Rectal	Pig	Enterococcus faecium	AMP10, P10, E15, TET30, CIP5, C30	1	1	0	1	1	1	0	1	0	0	0	0	0	0	0	0	0	0	1	0	1	1	1	0	0	0	0	0	0	0	0	0	0	1	1
Enfm04	2	Fecal	Pig	Enterococcus faecium	E15, TET30, CIP5, C30, LZD30, CN10	0	0	0	1	1	1	0	1	1	1	0	0	0	0	0	0	0	0	0	1	1	1	1	0	0	0	0	0	0	1	0	1	1	1	0
Enfm05	2	Fecal	Pig	Enterococcus faecium	E15, TET30, CIP5, C30, LZD30, CN10	0	0	0	1	1	1	0	1	1	1	0	0	0	1	1	1	1	0	0	1	1	1	1	0	0	0	0	0	0	1	0	0	0	1	0
Enfm07	2	Oral	Pig	Enterococcus faecium	AMP10, P10, E15, TET30, CIP5, C30, CN10	1	1	0	1	1	1	0	1	0	1	0	0	0	0	0	0	0	0	0	1	1	1	1	0	0	0	0	0	0	0	0	0	0	1	0
Enfm08	2	Oral	Pig	Enterococcus faecium	AMP10, P10, E15, TET30, CIP5, C30, CN10, CN120	1	1	0	1	1	1	0	1	0	1	1	0	0	0	0	0	0	0	0	1	1	1	1	0	0	0	0	0	0	0	0	0	0	1	0
P.En045	6	Oral	Pig	Enterococcus faecium	AMP10, P10, E15, TET30, CIP5, ENR5, C30, CN10	1	1	0	1	1	1	1	1	0	1	0	0	0	0	0	0	0	0	1	1	1	1	1	0	0	0	0	0	0	1	0	0	0	1	0
P.En067	6	Rectal	Pig	Enterococcus faecium	AMP10, P10, E15, TET30, CIP5, ENR5, C30, CN10	1	1	0	1	1	1	1	1	0	1	0	0	0	0	0	0	0	0	0	1	1	1	1	0	0	0	0	0	0	1	0	0	0	1	0
Enfm24	4	Rectal	Pig	Enterococcus faecium	P10, E15, TET30, CIP5, C30, CN10, CN120	0	1	0	1	1	1	0	1	0	1	1	0	0	0	1	0	0	0	0	0	1	1	1	0	0	0	0	0	0	1	0	1	1	1	0
P.En066	6	Rectal	Pig	Enterococcus faecium	AMP10, P10, E15, TET30, CIP5, C30, CN10	1	1	0	1	1	1	0	1	0	1	0	0	0	0	1	1	1	0	0	1	1	1	1	0	0	0	0	0	0	1	0	0	0	1	0
P.En085	6	Rectal	Pig	Enterococcus faecium	AMP10, P10, E15, TET30, CIP5, C30, CN10	1	1	0	1	1	1	0	1	0	1	0	0	0	0	1	1	1	0	0	1	1	1	1	0	0	0	0	0	1	1	0	0	0	1	0
P.En241	6	Fecal	Pig	Enterococcus faecium	AMP10, P10, E15, TET30, CIP5, ENR5, C30, CN10, CN120	1	1	0	1	1	1	1	1	0	1	1	0	0	0	0	0	0	0	1	1	1	1	1	0	0	0	0	0	0	1	0	0	0	1	0
P.En252	7	Fecal	Pig	Enterococcus faecium	AMP10, P10, E15, TET30, CIP5, ENR5, C30, LZD30, CN10, CN120	1	1	0	1	1	1	1	1	1	1	1	0	0	0	0	0	0	0	1	1	1	1	1	0	0	0	0	0	0	1	0	0	0	1	0
P.En268	6	Fecal	Human	Enterococcus faecium	AMP10, E15, TET30, CIP5, ENR5, C30, CN10	1	0	0	1	1	1	1	1	0	1	0	0	0	0	0	0	0	0	1	1	1	1	1	0	0	0	0	0	0	1	0	0	0	1	0
Enfm09	4	Oral	Pig	Enterococcus faecium	P10, E15, TET30, CIP5, C30, CN10	0	1	0	1	1	1	0	1	0	1	0	0	0	1	1	0	0	0	0	0	1	1	1	0	0	0	0	0	0	0	0	0	0	1	0
P.En023	6	Oral	Pig	Enterococcus faecium	P10, E15, TET30, CIP5, ENR5, CN10, CN120	0	1	0	1	1	1	1	0	0	1	1	0	0	0	1	0	0	0	0	0	1	1	1	0	0	0	0	0	0	1	0	0	0	0	0
P.En096	6	Nasal	Human	Enterococcus faecium	P10, E15, TET30, CIP5, ENR5, C30	0	1	0	1	1	1	1	1	0	0	0	0	0	0	0	0	0	0	0	1	1	1	1	0	0	0	0	0	0	0	0	0	0	1	0
P.En097	6	Nasal	Human	Enterococcus faecium	P10, E15, TET30, CIP5, ENR5, C30, CN10	0	1	0	1	1	1	1	1	0	1	0	0	0	0	0	0	0	0	0	1	1	1	1	0	0	0	0	0	0	0	0	0	0	1	0
P.En065	6	Oral	Pig	Enterococcus faecium	AMP10, P10, E15, TET30, CIP5, C30, CN10, CN120	1	1	0	1	1	1	0	1	0	1	1	0	0	1	1	0	0	0	0	1	1	1	1	0	0	0	0	0	0	1	0	0	0	1	0
P.En087	6	Oral	Pig	Enterococcus faecium	AMP10, P10, E15, TET30, CIP5, ENR5, C30, CN10, CN120	1	1	0	1	1	1	1	1	0	1	1	0	0	0	0	0	0	0	0	1	1	1	1	0	0	0	0	0	0	1	0	0	0	1	0
P.En264	6	Fecal	Human	Enterococcus faecium	E15, TET30, CIP5, ENR5, C30, LZD30	0	0	0	1	1	1	1	1	1	0	0	0	0	0	1	0	0	0	1	0	1	1	1	0	0	0	0	0	0	0	0	0	0	0	0
P.En059	6	Rectal	Pig	Enterococcus faecium	AMP10, P10, E15, TET30, CIP5, C30	1	1	0	1	1	1	0	1	0	0	0	0	0	1	1	0	0	0	0	1	1	1	1	0	0	0	0	0	0	0	0	0	0	1	0
P.En060	6	Oral	Pig	Enterococcus faecium	AMP10, P10, E15, TET30, CIP5, C30, CN10	1	1	0	1	1	1	0	1	0	1	0	0	0	0	0	0	0	0	0	1	1	1	1	0	0	0	0	0	0	0	0	0	0	1	0
Enfm12	1	Fecal	Human	Enterococcus faecium	E15, CIP5, CN10	0	0	0	1	0	1	0	0	0	1	0	0	0	0	1	1	0	0	1	1	1	0	0	0	0	0	0	0	0	0	0	0	0	0	0
Enfm15	1	Fecal	Human	Enterococcus faecium	E15, CIP5, CN10	0	0	0	1	0	1	0	0	0	1	0	0	0	0	1	1	0	0	0	0	0	0	0	0	0	0	0	0	0	0	0	0	0	0	0
