# Supplementary material for: Occurrence of virulent multidrug-resistantEnterococcus faecalisandEnterococcus faeciumin the pigs, farmers and farm environments in Malaysia
Source: PeerJ journal article supplement (doi:10.7717/peerj.5353), 2018-08-06
Supplement: Supplementary_File_1.pdf [file Supplementary_File_1.pdf]

15 Supplementary Table 1. Primers used for resistance and virulence genes detection

| No. | Primer name                   | Primer sequences                                        | Size  | Reference                     |
|-----|-------------------------------|---------------------------------------------------------|-------|-------------------------------|
| 1   | <i>esp</i>                    | TTACCAAGATGGTTCTGTAGGCAC<br>CCAAGTATACTTAGCATCTTTTGG    | 913   | Shankar et al.,<br>1999       |
| 2   | <i>cyl</i>                    | ACTCGGGGATTGATAGGC<br>GCTGCTAAAGCTGCGCTT                | 688   | Vankerckhoven<br>et al., 2004 |
| 3   | <i>hyl</i>                    | ACAGAAGAGCTGCAGGAAATG<br>GACTGACGTCCAAGTTTCCAA          | 276   | Vankerckhoven<br>et al., 2004 |
| 4   | <i>ace</i>                    | AAAGTAGAATTAGATCCACAC<br>TCTATCACATTCGGTTGCG            | 320   | Mannu et al.,<br>2003         |
| 5   | <i>gelE</i>                   | AGTTCATGTCTATTTTCTTCAC<br>CTTCATTATTTACACGTTTG          | 402   | Mannu et al.,<br>2003         |
| 6   | <i>efaA</i>                   | CGTGAGAAAGAAATGGAGGA<br>CTACTAACACGTCACGAATG            | 499   | Mannu et al.,<br>2003         |
| 7   | <i>tetM</i>                   | ACAGAAAGCTTATTATATAAC<br>TGGCGTGTCTATGATGTTTAC          | 171   | Aminov et al.,<br>2001        |
| 8   | <i>tetL</i>                   | GTMGTTGCGCGCTATATTCC<br>TGAAMGRWAGCCCACCTAA             | 696   | Gever et al.,<br>2003         |
| 9   | <i>ermA</i>                   | TCTAAAAAGCATGTAAAAAGAA<br>CTTCGATAGTTTATTAATATTAGT      | 645   | Dutka-Malen et<br>al., 1995   |
| 10  | <i>ermB</i>                   | GAAAAGGTACTIONCAACCAAATA<br>AGTAACGGTACTTAAATTGTTTAC    | 639   | Dutka-Malen et<br>al., 1995   |
| 11  | <i>msrA/B</i>                 | GCAAATGGTGTAGGTAAGACA<br>ACTATCATGTGATGTAAACAAAAT       | 399   | Dutka-Malen et<br>al., 1995   |
| 12  | <i>aac(6')-Ie-aph(2'')-Ia</i> | CAGAGCCTTGGGAAGATGAAG<br>CCTCGTGTAATTCATGTTCTGGC        | 348   | Vakulenko et<br>al., 2003     |
| 13  | <i>aph(2'')-Ib</i>            | CTTGGACGCTGAGATATATGAGCAC<br>GTTTGTAGCAATTCAGAAACACCCTT | 867   | Vakulenko et<br>al., 2003     |
| 14  | <i>aph(2'')-Ic</i>            | CCACAATGATAATGACTCAGTTCCC<br>CCACAGCTTCCGATAGCAAGAG     | 444   | Vakulenko et<br>al., 2003     |
| 15  | <i>aph(2'')-Id</i>            | GTGGTTTTTACAGGAATGCCATC<br>CCCTCTTCATACCAATCCATATAAC    | 641   | Vakulenko et<br>al., 2003     |
| 16  | <i>aph(3')-IIIa</i>           | GGCTAAAATGAGAATATCACCGG<br>CTTTAAAAAATCATACAGCTCGCG     | 523   | Vakulenko et<br>al., 2003     |
| 17  | <i>ant(4')-Ia</i>             | CAAACCTGCTAAATCGGTAGAAGCC<br>GGAAAGTTGACCAGACATTACGAACT | 294   | Vakulenko et<br>al., 2003     |
| 18  | <i>vanA</i>                   | CATGAATAGAATAAAAAGTTGCAATA<br>CCCCTTTAACGCTAATACGATCAA  | 1,030 | Clark et al.,<br>1993         |
| 19  | <i>vanB</i>                   | GTGACAAACCGGAGGCGAGGA<br>CCGCCATCCTCCTGCAAAAAA          | 433   | Clark et al.,<br>1993         |
| 20  | <i>vanC1</i>                  | GGTATCAAGGAAACCTC<br>CTTCCGCCATCATAGCT                  | 822   | Dutka-Malen et<br>al., 1995   |

---

|    |                 |                                          |     |                        |
|----|-----------------|------------------------------------------|-----|------------------------|
| 21 | <i>vanC2/C3</i> | CGGGGAAGATGGCAGTAT<br>CGCAGGGACGGTGATTTT | 484 | Satake et al.,<br>1997 |
|----|-----------------|------------------------------------------|-----|------------------------|

---
