# Supplementary material for: Occurrence of virulent multidrug-resistantEnterococcus faecalisandEnterococcus faeciumin the pigs, farmers and farm environments in Malaysia
Source: PeerJ journal article supplement (doi:10.7717/peerj.5353), 2018-08-06

**Occurrence of virulent multidrug-resistant *Enterococcus faecalis* and *Enterococcus faecium* in the pigs,  
farmers and farm environments**

**Journal: Tropical Animal Health and Production**

**Shiang Chiet Tan<sup>a</sup>, Chun Wie Chong<sup>b</sup>, Cindy Shuan Ju Teh<sup>c</sup>, Peck Toung Ooi<sup>d</sup>, Kwai Lin Thong<sup>a\*</sup>**

<sup>a</sup> Institute of Biological Science, Faculty of Science, University of Malaya, Kuala Lumpur, Malaysia

<sup>b</sup> Department of Life Science, School of Pharmacy, International Medical University, Kuala Lumpur, Malaysia

<sup>c</sup> Department of Medical Microbiology, Faculty of Medicine, University of Malaya, Kuala Lumpur, Malaysia

<sup>d</sup> Department of Veterinary Clinical Studies, Faculty of Veterinary Medicine, University Putra Malaysia, Serdang,  
Malaysia

\* Corresponding author:

Kwai Lin Thong<sup>a</sup>

Email: [thongkl@um.edu.my](mailto:thongkl@um.edu.my), Tel: +60379674437

Supplementary Figure A.3 Dendrogram of *E. faecalis* based on PFGE

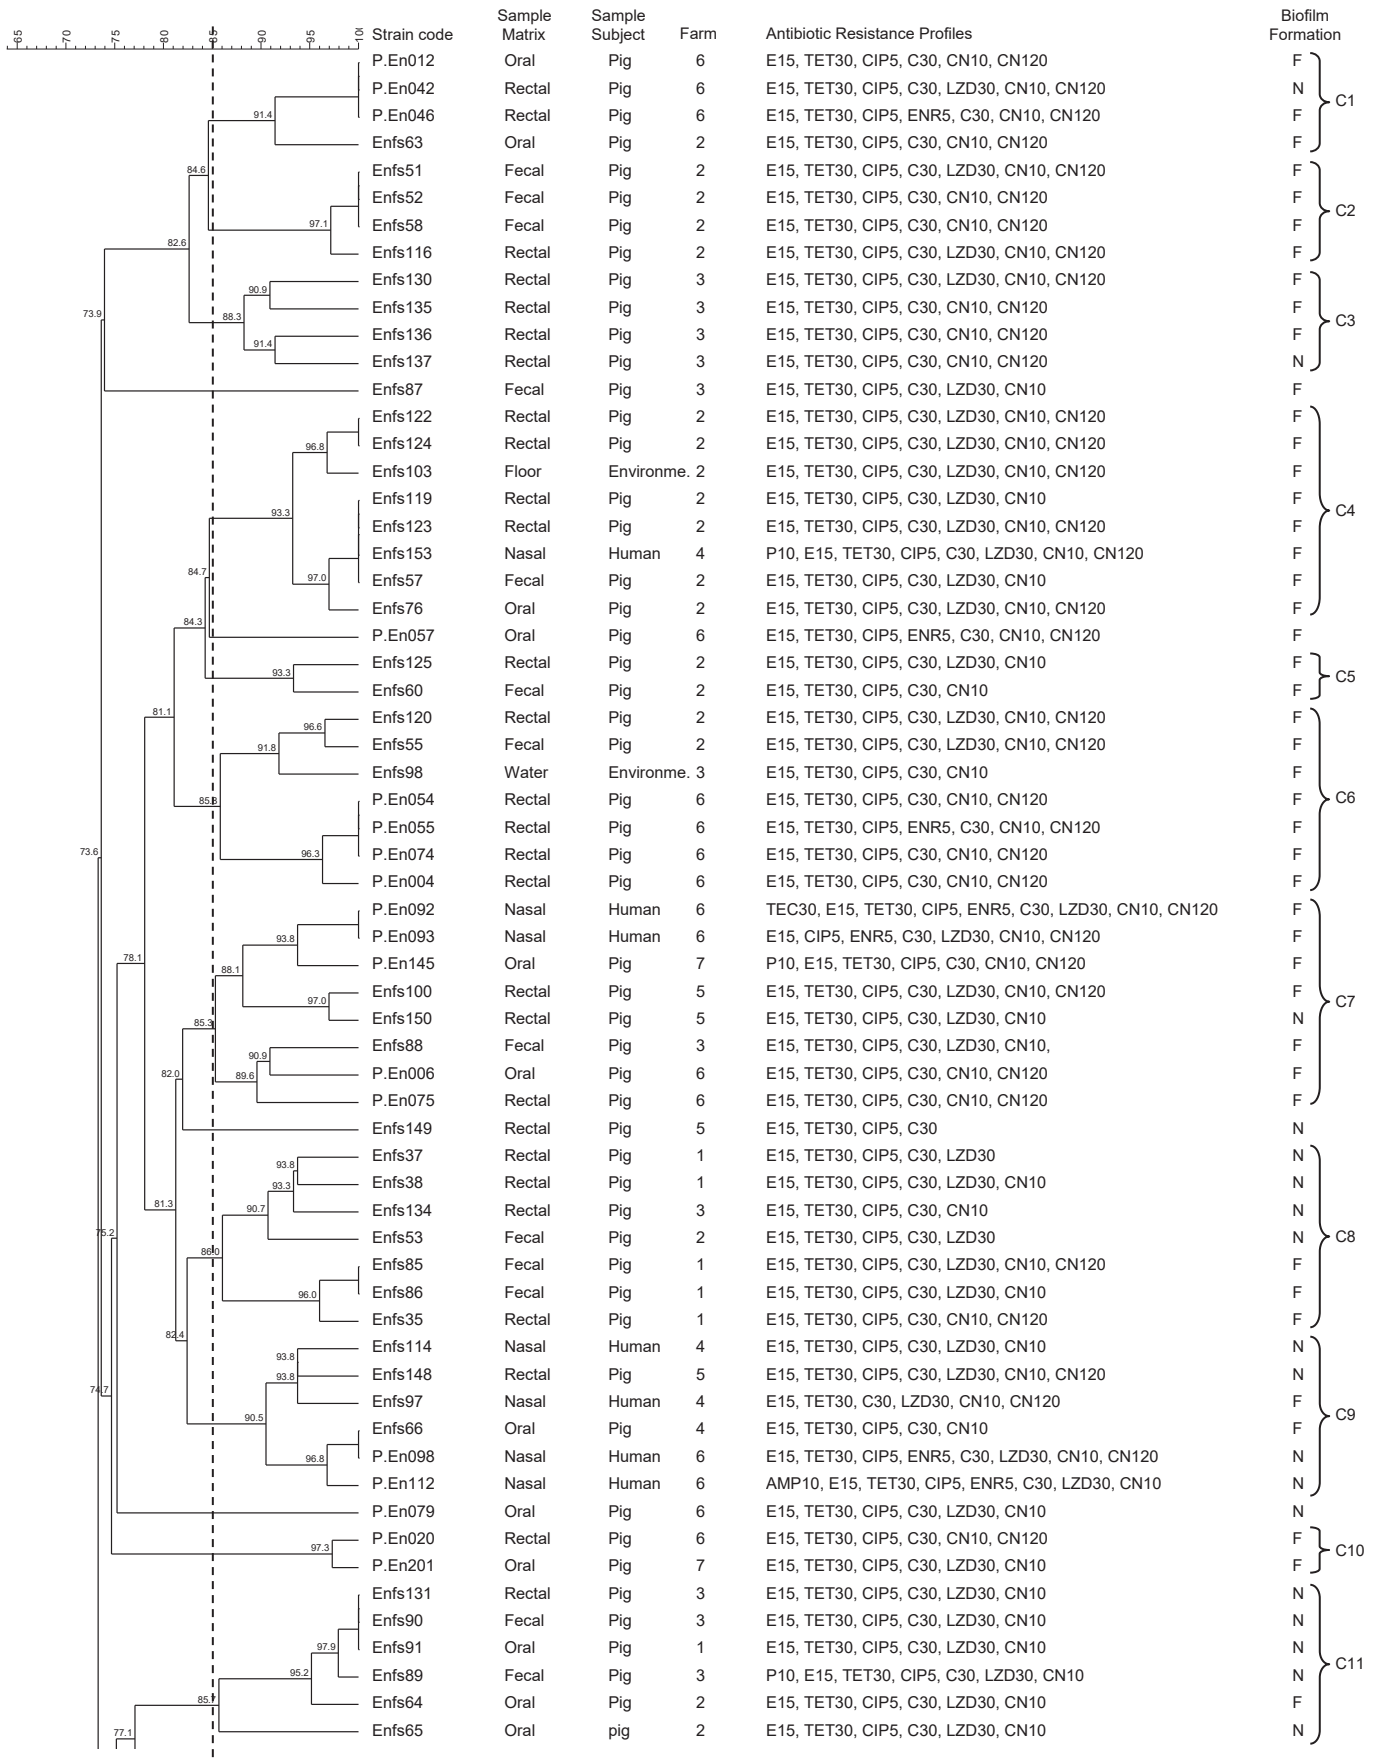

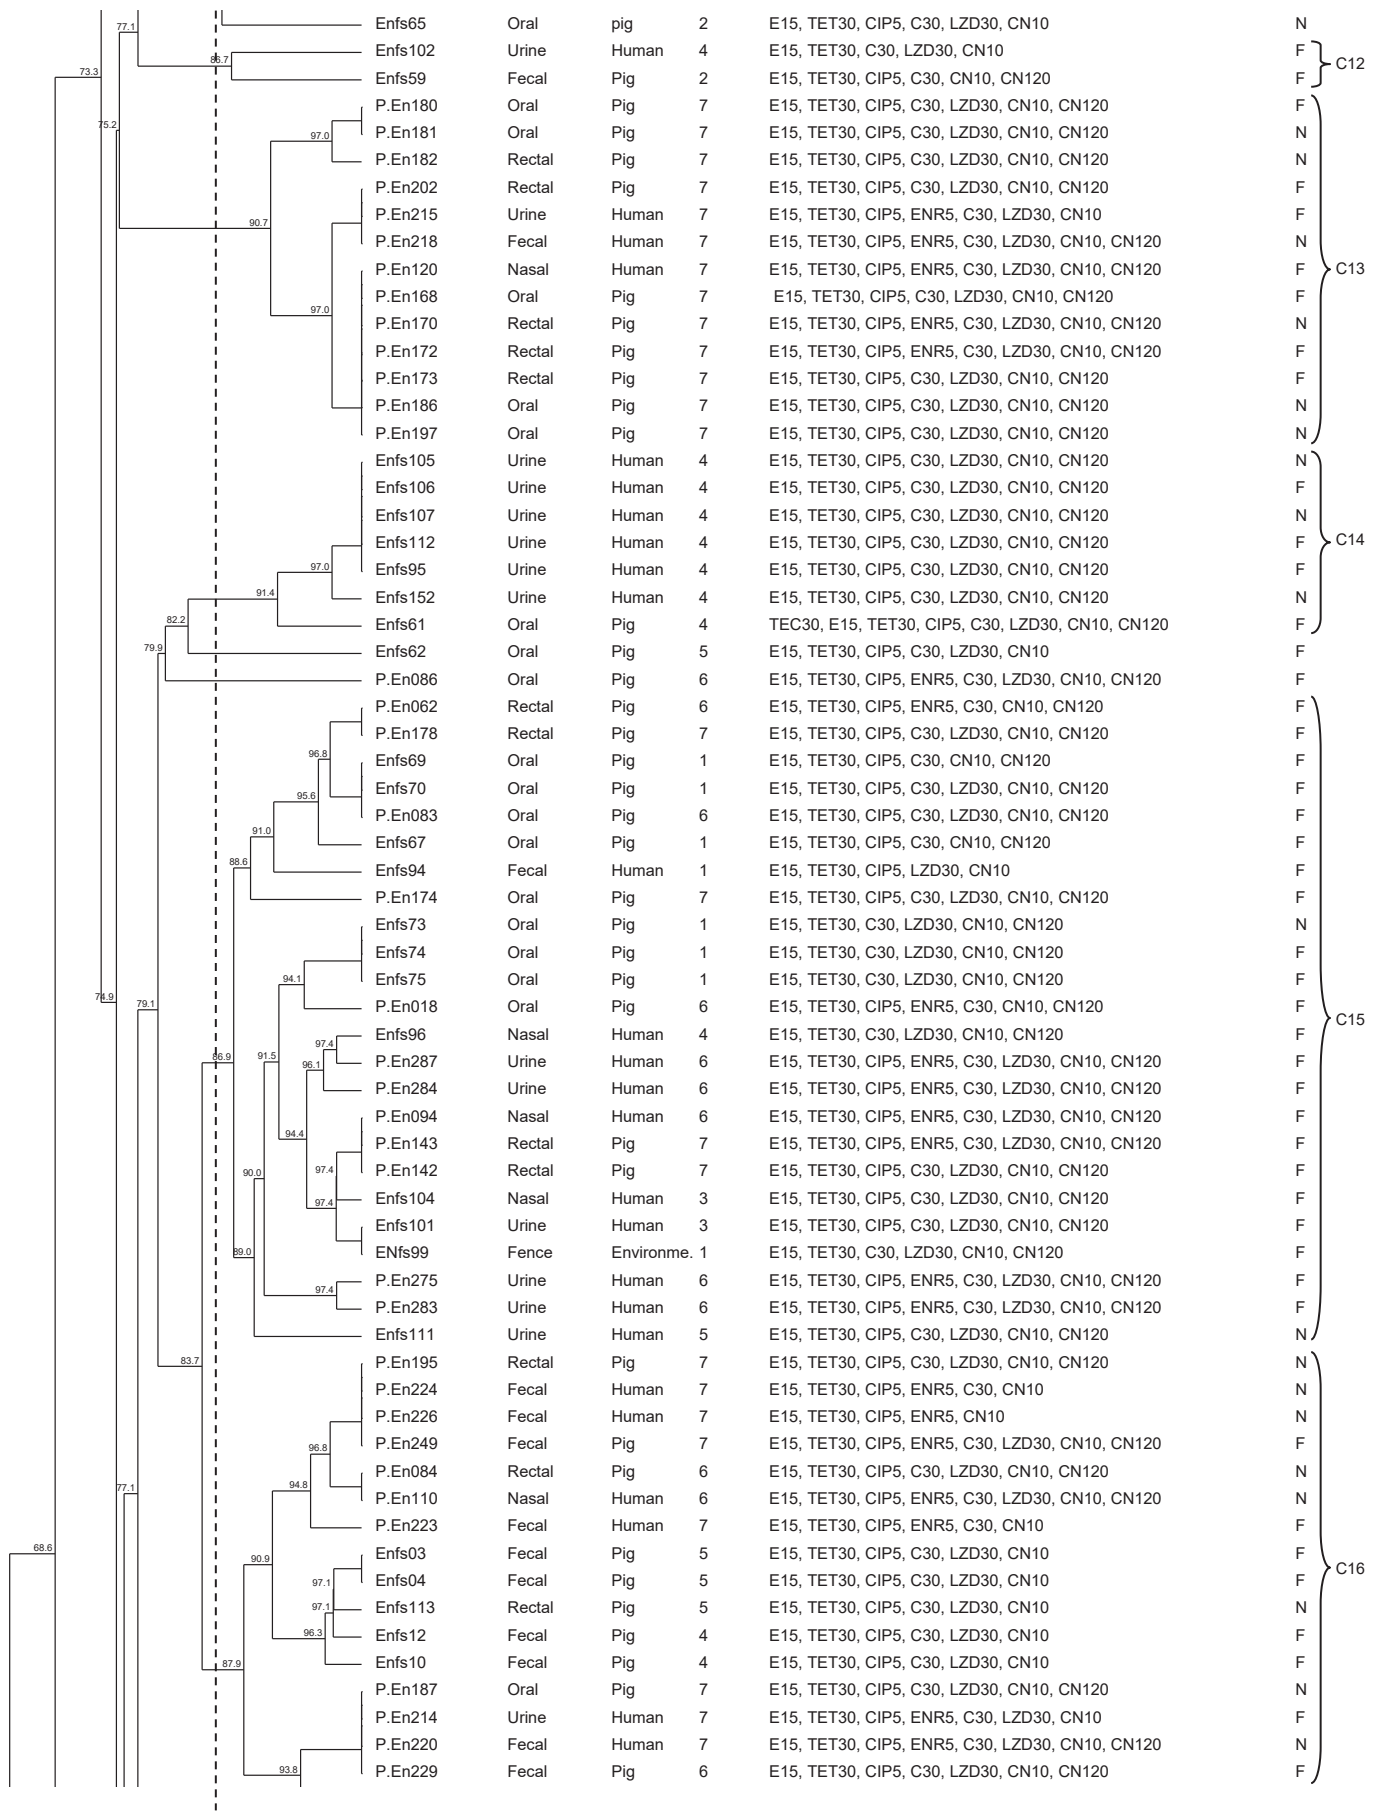

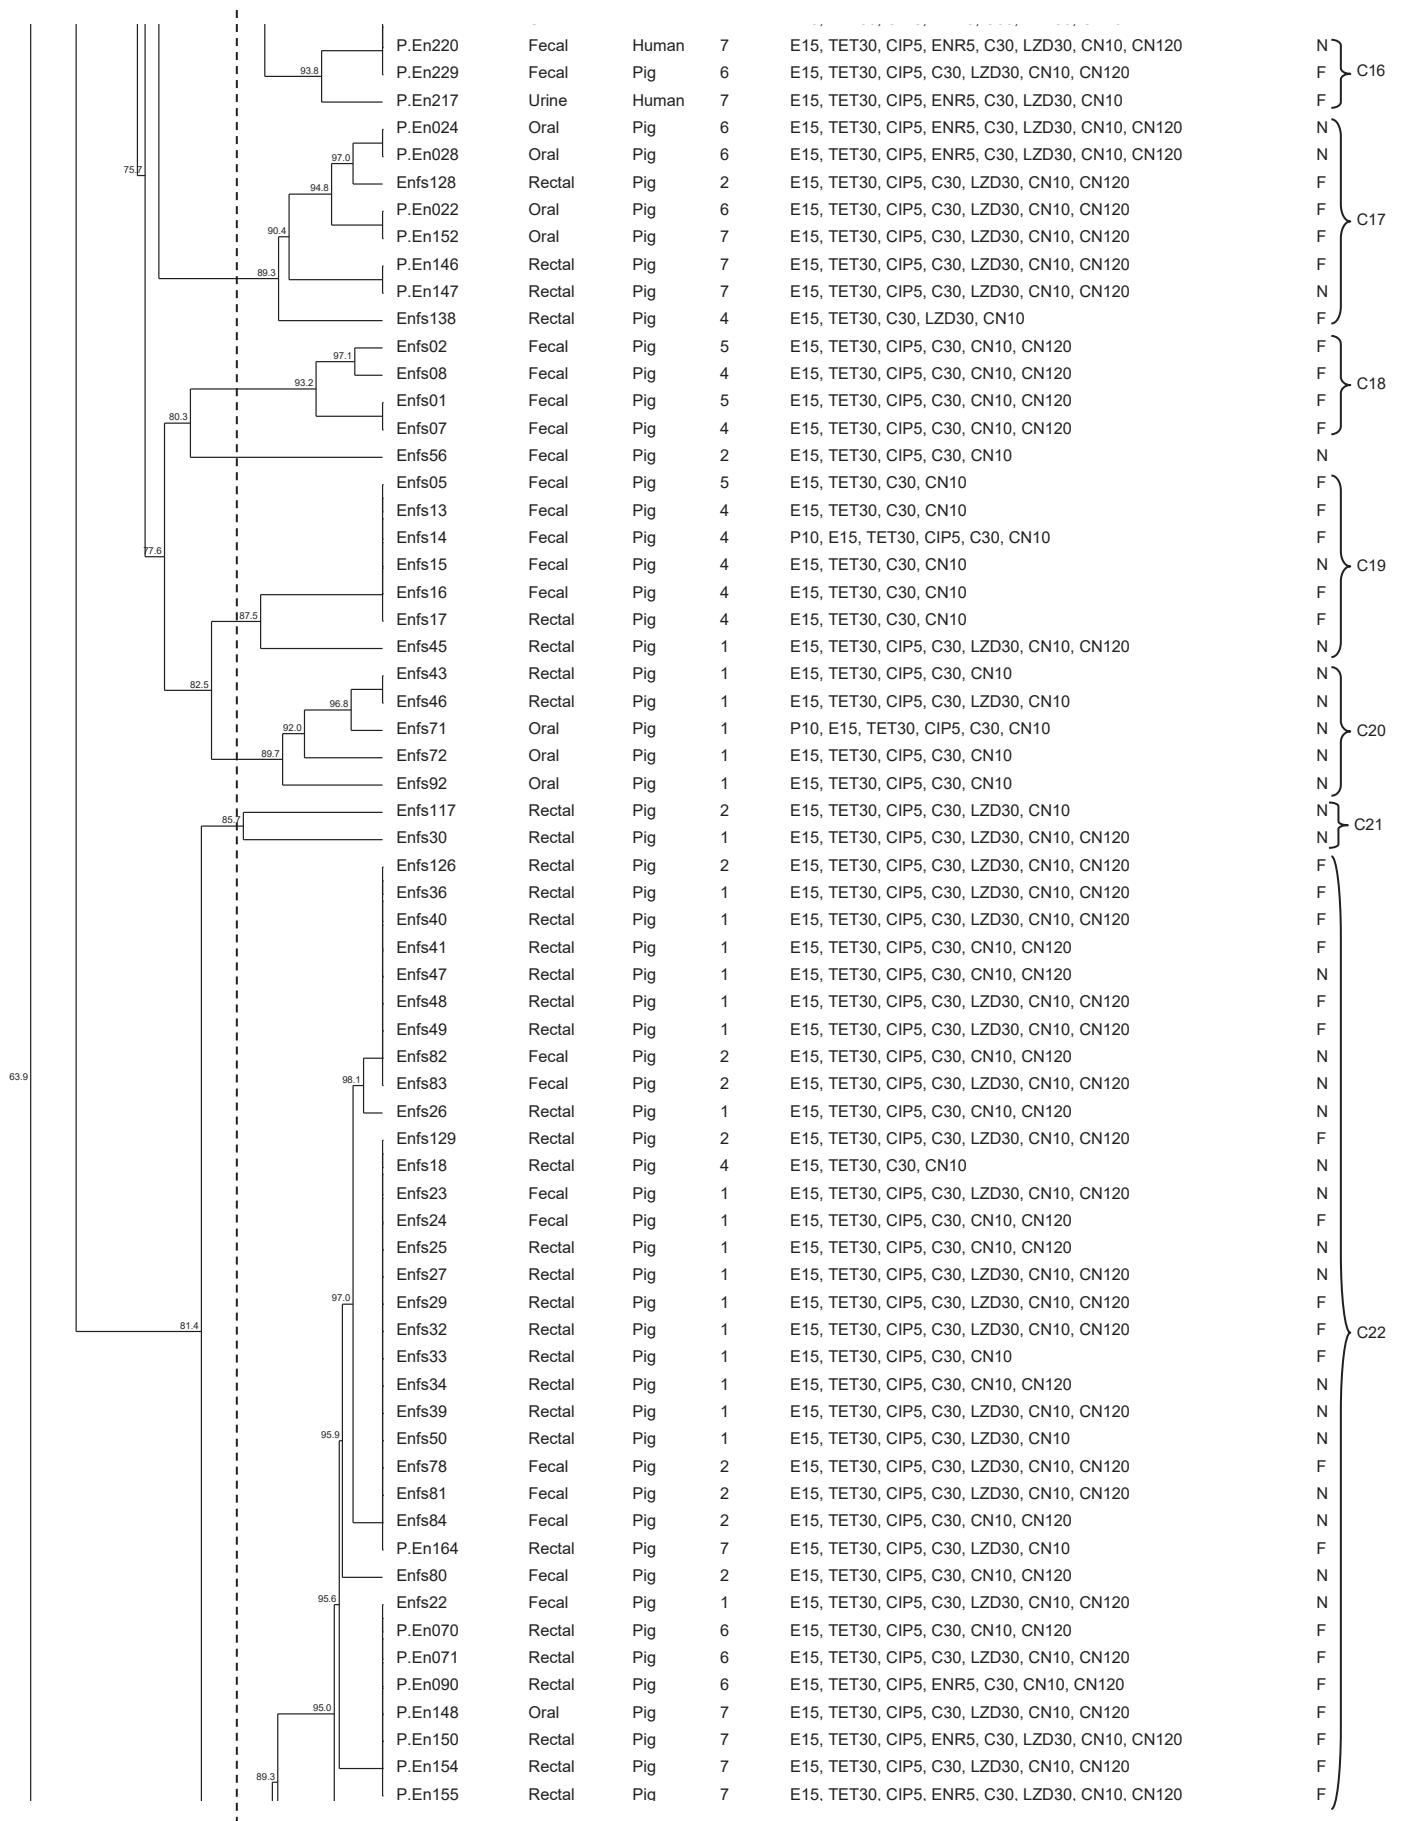

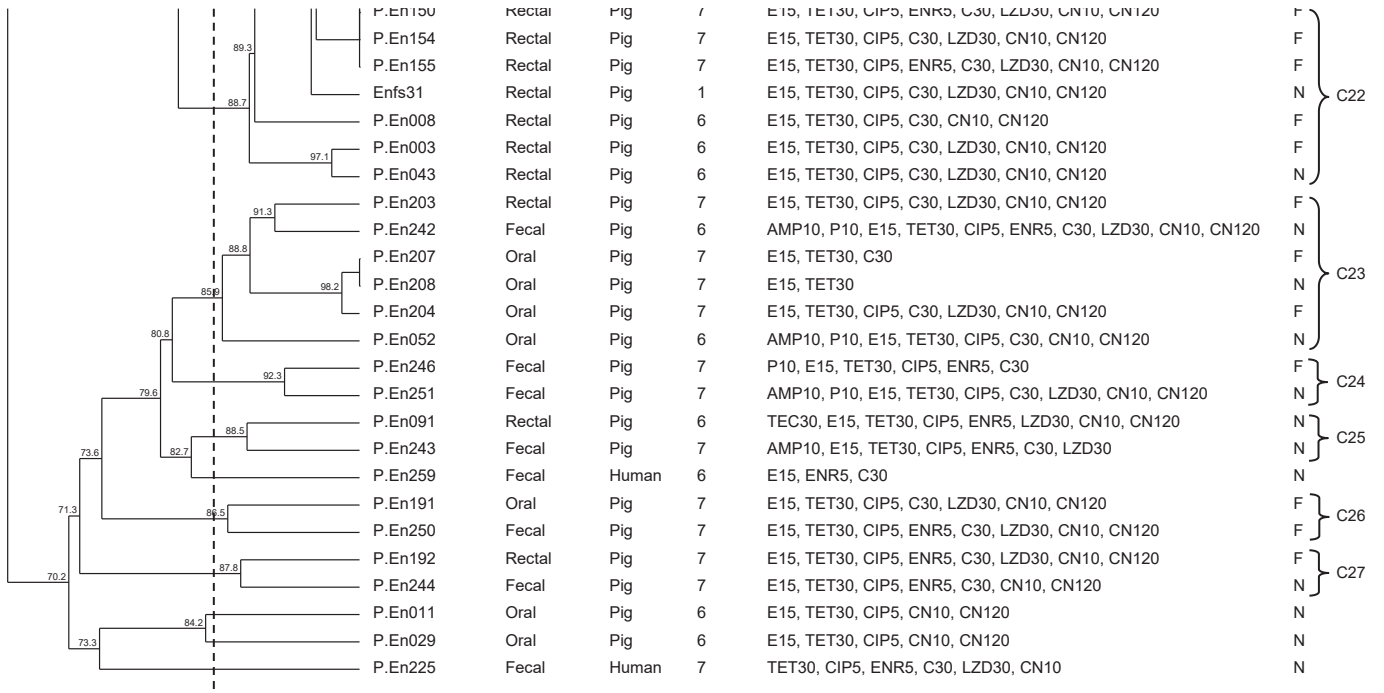

Supplement: Supplementary_File_4.pdf [file Supplementary_File_4.pdf]
